RESEARCH ARTICLE

# Comparative proteomic analysis of eggplant (*Solanum melongena* L.) heterostylous pistil development

Yikui Wang<sup>1,2</sup>, Ake Liu<sup>3</sup>, Wenjia Li<sup>2</sup>, Yaqing Jiang<sup>2</sup>, Shiwei Song<sup>1</sup>, Yan Li<sup>2</sup>, Riyuan Chen<sup>1\*</sup>

**1** College of Horticulture, South China Agricultural University, Guangzhou, China, **2** Institute of Vegetable Research, Guangxi Academy of Agricultural Sciences, Nanning, China, **3** State Key Laboratory of Genetic Engineering, School of Life Sciences, Fudan University, Shanghai, China

☞ These authors contributed equally to this work.

\* [rychen@scau.edu.cn](mailto:rychen@scau.edu.cn)

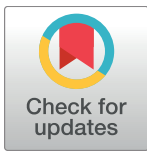

**OPEN ACCESS**

**Citation:** Wang Y, Liu A, Li W, Jiang Y, Song S, Li Y, et al. (2017) Comparative proteomic analysis of eggplant (*Solanum melongena* L.) heterostylous pistil development. PLoS ONE 12(6): e0179018. <https://doi.org/10.1371/journal.pone.0179018>

**Editor:** Serena Aceto, University of Naples Federico II, ITALY

**Received:** October 4, 2016

**Accepted:** May 23, 2017

**Published:** June 6, 2017

**Copyright:** © 2017 Wang et al. This is an open access article distributed under the terms of the [Creative Commons Attribution License](https://creativecommons.org/licenses/by/4.0/), which permits unrestricted use, distribution, and reproduction in any medium, provided the original author and source are credited.

**Data Availability Statement:** All relevant data are within the paper and its Supporting Information files.

**Funding:** This study was financially supported by National Natural Science Foundation of China (31660573), China Agriculture Research System (CARS-25-C-04), and the Guangxi Innovation Team Project of Vegetable of China Agriculture Research System (nycytxgxcxd-03-10). The funders had no role in study design, data collection and analysis, decision to publish, or preparation of the manuscript.

## Abstract

Heterostyly is a common floral polymorphism, but the proteomic basis of this trait is still largely unexplored. In this study, self- and cross-pollination of L-morph and S-morph flowers and comparison of embryo sac development in eggplant (*Solanum melongena* L.) suggested that lower fruit set from S-morph flowers results from stigma-pollen incompatibility. To explore the molecular mechanism underlying heterostyly development, we conducted isobaric tags for relative and absolute quantification (iTRAQ) proteomic analysis of eggplant pistils for L- and S-morph flowers. A total of 5,259 distinct proteins were identified during heterostyly development. Compared S-morph flowers with L-morph, we discovered 57 and 184 differentially expressed proteins (DEPs) during flower development and maturity, respectively. Quantitative real time polymerase chain reactions were used for nine genes to verify DEPs from the iTRAQ approach. During flower development, DEPs were mainly involved in morphogenesis, biosynthetic processes, and metabolic pathways. At flower maturity, DEPs primarily participated in biosynthetic processes, metabolic pathways, and the formation of ribosomes and proteasomes. Additionally, some proteins associated with senescence and programmed cell death were found to be upregulated in S-morph pistils, which may lead to the lower fruit set in S-morph flowers. Although the exact roles of these related proteins are not yet known, this was the first attempt to use an iTRAQ approach to analyze proteomes of heterostylous eggplant flowers, and these results will provide insights into biochemical events taking place during the development of heterostyly.

## Introduction

In flowering plants, different strategies have evolved to avoid selfing and promote outcrossing, of which heterostyly is one of the most effective mechanisms. Heterostyly, a complex floral polymorphism, can aid in environmental adaptations of plants and accelerate species diversification [1,2]. Heterostyly has arisen independently in at least 20 lineages and is present in 199

**Competing interests:** The authors have declared that no competing interests exist.

genera, distributed among 28 families in 15 orders [1,3]. Heterostylous plants usually include two (distyly) or three (tristyly) genetic morphs with reciprocal displacement of sexual organs (stigmas and anthers) within an individual [4]. For example, in eggplant (*Solanum melongena* L.), plants produce two types of flowers (distyly): either long-styled flowers with anthers attached midway along the floral tube (L-morph or pin), or short-styled flowers with anthers attached at the top of the floral tube (S-morph or thrum). This character promotes outcrossing between morphs via delivery and uptake of pollen by pollinators [5].

Although many angiosperms are heterostylous, only a few differentially expressed genes (DEGs) have been detected for the condition, and the regulatory molecular mechanisms are not well understood. Ushijima *et al.* [6] elaborated molecular differences by comparing transcripts and proteins in the thrum and pin flowers of *Linum grandiflorum* Desf. These floral phenotypes were known to be regulated by the S locus and differed in style length, pollen size, and anther length [7]. Four genes, *TSS1*, *API*, *MYB21*, and *SKS1*, were predicted to be related to heterostyly development [6]. However, there was no difference in messenger ribonucleic acid accumulations of these four genes, indicating that they were controlled by floral morph-specific post-transcriptional regulation [6]. Transcriptome analysis for both *Primula veris* L. and the closely related species *P. vulgaris* Huds. demonstrated that 113 candidate heterostyly genes showed significant floral morph-specific differential expression [8].

Since the development of RNA sequencing (RNA-seq) technology, it has been easy to document changes in gene expression at the transcriptional level. However, the transcriptional changes are not always directly related to expression of the corresponding proteins because of posttranslational regulatory mechanisms [9,10], alternative splicing, and protein degradation [11]. Proteomic approaches provide valuable tools for monitoring developmental profiles directly at the protein level and therefore have been widely used [12–14]; approaches include two dimensional gel electrophoresis (2-DE), differential in gel electrophoresis (DIGE), tag-based labeling of proteins (isotope-coded affinity tags (ICAT)), stable isotope labeling with amino acids in cell culture (SILAC), isobaric tags for relative and absolute quantification (iTRAQ), protein-protein interaction, and protein modifications [15]. iTRAQ is a powerful technology that allows identification of numerous proteins between different samples [13]. Furthermore, if iTRAQ returns a sufficient number of differentially expressed proteins (DEPs), pathway and protein-protein interaction analyses can be conducted [13,14,16].

iTRAQ provides advantages in labeling of complex samples, with comparatively high throughput and identification of low-abundance proteins in complex samples [17,18]. Since Ross *et al.* [19] first published an approach using iTRAQ to examine the global protein expression of a wild-type yeast strain, this technique has been widely used to document quantum changes in DEPs in plants and animals [12–14]. Meng *et al.* [20] then applied iTRAQ in a proteomic study of blood cells infected with *Spiroplasma eriocheiris*. Yang *et al.* [14] discovered genes related to grain development in an analysis of wheat grain protein expression at different stages. The study of regulated protein expression levels in different eggplant flower morphs should provide insights into heterostyly developmental mechanisms.

Eggplant is a heterostylous plant that is widely cultivated [21]. The S-morph flowers generally possess a small and highly reduced gynoecium, and are often functionally staminate, limiting production. Therefore, understanding the molecular genetics that regulate heterostyly could lead to improved selection for better production. In this study, we performed an iTRAQ-based quantitative proteome analysis of pistils of two flower morphs from the budding to the blooming stage. The general workflow is shown in S1 Fig. Our results provide information about differences in proteins during heterostylous development and highlight the value of proteomics in characterizing complex biochemical processes.

## Materials and methods

### Floral measurements

Eggplant B3-3 lines were grown at the Guangxi Academy of Agricultural Sciences and cultivated in a field using conventional methods. Plants produced two morphologically different types of flowers: long morph (L-morph) and short morph (S-morph). We randomly selected 30 S-morph and 40 L-morph flowers from budding to blooming to measure the pistil length and bud length with a Vernier caliper and conducted a correlation analysis using Microsoft Excel 2016.

### Stigma-pollen interactions

The flowers were emasculated in bud and bagged to exclude pollinators before and after hand pollination. The stigmas were collected at 1, 2, 4, 6, 8, 12, 24, or 48 h after pollination and fixed for more than 24 h in a mixture of Formalin-acetic acid-ethanol. The samples were washed with distilled water and immersed in 2 mol·L<sup>-1</sup> NaOH in a 60°C water bath for 12 h. Specimens were washed again with distilled water and were stained with 0.1% aniline blue for 4 h, and then mounted on glass slides. The samples were covered with 80% glycerin and observed under an inverted fluorescence microscope (Olympus BX51, Japan).

### Female gametophyte development

To investigate whether differences in embryo sac development reduced successful fertilization, we sectioned flowers embedded in paraffin. From budding to blooming, we collected S-morph and L-morph pistils every 2 days and fixed them in a Formalin-acetic acid-ethanol mixture. The samples were dehydrated in an ethanol series (10 min each in 35%, 55%, 75%, 85%, 95%, and 100% [v/v]), cleared in a xylene series (10 min each in 35%, 55%, 75%, 85%, 95%, and 100% [v/v]), and embedded in paraffin (melting point: 54–56°C) for 48 h at 56°C. Embedded specimens were serially sectioned at a thickness of 6 μm and mounted on glass slides. They were prepared with a 2% ferrovandium mordant for 30 min, stained with 5% hematoxylin for 1.5 h, and then destained with saturated picric acid for 1.5 h. Finally, coverslips were mounted with neutral balsam and the slides were observed under an OLYMPUS BX-51 light microscope (Olympus Co. Ltd., Japan).

### Protein extraction

We divided flower development into five stages from budding to blooming: 0, 3, 6, 10, or 13 days after budding (DAB). The flowers at 0, 3, and 6 DAB were considered development samples. We collected mixed samples of pistils at 0, 3, and 6 DAB from S-morph and L-morph flowers. Pistils collected at 13 DAB were kept separately as mature flower samples. All tissue samples were stored at -80°C liquid nitrogen until protein extraction.

The pistil samples were ground into powder under liquid nitrogen and extracted with lysis buffer A (7 M urea, 2 M thiourea, 4% 3-[(3-cholamidopropyl)dimethylammonio]-1-propane-sulfonate, 40 mM Tris-HCl, pH 8.5) containing 1 mM phenylmethylsulfonyl fluoride and 2 mM ethylenediaminetetraacetic acid. After 5 min, 10 mM dithiothreitol was added. After sonication and centrifugation, the suspension was mixed well with a 5-fold volume of chilled acetone containing 10% trichloroacetic acid and incubated overnight at -20°C. After centrifugation (4°C, 30,000 ×g), the precipitate was washed three times with chilled acetone. The pellet was air-dried and dissolved in lysis buffer B (7 M urea, 2 M thiourea, 4% nonylphenol ethoxylate (NP-40), and 20 mM Tris-HCl, pH 8.5). The suspension was sonicated for 15 min and centrifuged at 4°C and 30,000 ×g for 15 min. Subsequently, 10 mM dithiothreitol was added to

reduce disulfide bonds in proteins in the supernatant, and the solution was incubated at 56°C for 1 h. Next, 55 mM iodoacetamide was added to bind to cysteines and the solution was incubated for 1 h in the dark. The supernatant was mixed well with a 5-fold volume of chilled acetone for 2 h at -20°C. After centrifugation (30,000 ×g for 20 min), the pellet was air-dried for 5 min, then dissolved in 500 µL of 0.5 M triethylammonium bicarbonate and sonicated for 15 min. Finally, after centrifugation at 4°C and 30,000 ×g for 15 min, the supernatant was transferred into a new tube and quantified by Bradford's method [22]. The proteins in the supernatant were stored at -80°C for further analysis.

### iTRAQ labeling and chromatography fractionation

Total protein (100 µg) taken from each sample solution was digested with Trypsin Gold (Promega, USA) with a 20:1 ratio of protein:trypsin at 37°C for 4 h. After trypsinization and drying by vacuum centrifugation, peptides were redissolved using 0.5 M triethylammonium bicarbonate and iTRAQ reagent (Applied Biosystems, USA) according to the manufacturer's instructions. Each group of peptides was marked by different iTRAQ tags and incubated at room temperature for 2 h. We mixed all groups of tagged peptides, purified them using a strong cation exchange chromatography column (Phenomenex, USA), and separated them by liquid chromatography (LC) using a LC-20AB high pressure LC pump system (Shimadzu, Japan). Then we redissolved tagged mixed peptides with 4 mL of buffer A (25 mM NaH<sub>2</sub>PO<sub>4</sub> in 25% acetonitrile (ACN), pH 2.7) and loaded them onto a 4.6 × 250 mm Ultremex strong cation exchange column containing 5 mm particles (Phenomenex). Gradient elution was applied to peptides at a flow rate of 1 mL min<sup>-1</sup>, in which we initially used buffer A for 10 min elution and then progressively interfused 5–35% buffer B (25 mM NaH<sub>2</sub>PO<sub>4</sub>, 1 M KCl in 25% ACN, pH 2.7) for 11 min elution. Finally, we conducted 1 min elution with 35–80% buffer B. The entire elution process was monitored by measuring the absorbance at 214 nm, and each component was desalted with a Strata X C18 column and vacuum dried.

### LC-electrospray ionization-tandem mass spectrometry analysis

A nanoACQuity (Waters, USA) rapid separation LC system connected with the mass spectrometer, including a Symmetry C18 column (5 µm, 180 µm × 20 mm), was used for peptide absorption and desalting, and a BEH130 C18 column (1.7 µm, 100 µm × 100 mm) was used for separation. Both mobile phase buffer A (98:2:0.1 H<sub>2</sub>O:ACN:HCOOH) and buffer B (2:98:0.1 H<sub>2</sub>O:ACN:HCOOH) were added with a certain ratio of correction fluid (Thermo Fisher Scientific, USA). A 2.25 µg (9 µl) amount was loaded each time. Peptide absorption and desalting were carried out with buffer A at a flow rate of 2 µL min<sup>-1</sup> for 15 min elution. The samples were loaded with 5% buffer B at 300 nL min<sup>-1</sup> for 1 min, and then a 40 min gradient was run starting with 5–35% buffer B, followed by 5 min of linear gradient to 80%, followed by 5 min of maintenance at 80%, and a final 2 min at 5%.

Data were acquired with a TripleTOF 5600 System (AB SCIEX, Concord, ON) fitted with a Nanospray III source (AB SCIEX), with a pulled quartz tip as the emitter (New Objectives, Woburn, MA), controlled by the software program Analyst 1.6 (AB SCIEX). The following mass spectrometry conditions were used: 2.5 kV ion spray voltage, 30 psi curtain gas, 15 psi nebulizer gas, and 150°C interface heater temperature. The resolution was approximately 30,000. For independent data acquisition, survey scans were acquired in 250 ms and as many as 30 product ion scans were collected if they exceeded a threshold of 120 counts s<sup>-1</sup> and had a 2+ to 5+ charge state. The total cycle time was fixed at 3.3 s. The second quadrupole transmission window was 100 Da for 100%. Four time bins were summed for each scan at a pulsed frequency value of 11 kHz through monitoring of a 40 GHz multichannel time-to-digital detector

with four anode channels. An adjusted iTRAQ rolling collision energy was applied to all precursor ions for collision-induced dissociation. Dynamic exclusion was set for 1/2 of peak width (15 s), and then the precursor was refreshed off the exclusion list.

## Protein identification and bioinformatics analysis

Raw mass spectrum files were converted into Mascot generic files and protein identification was conducted using Mascot (version 2.3.02) to search for predicted proteins in the Eggplant Genome DataBase (<http://eggplant.kazusa.or.jp/>). For further functional analysis, differential expression of proteins was analyzed for significant downregulation or upregulation. A change in expression was determined by comparing the S-morph and L-morph flower pistils during two developmental stages, and *t*-tests were used to identify significant ( $p < 0.05$ ) differences. The proteins with an average fold-change  $\geq 1.5$  or  $\leq 0.667$ , and unique proteins with at least two peptide matches, were confidently defined as differentially expressed proteins (DEPs).

Proteins were classified by Gene Ontology (GO) analysis with AmiGO 2 (<http://amigo.geneontology.org/amigo>) based on three categories: biological process, cellular component, and molecular function. The Kyoto Encyclopedia of Genes and Genomes (KEGG) was used to annotate pathways in the KEGG pathway database (<http://www.genome.jp/kegg/pathway.html>) [23]. The statistical significance of GO terms or KEGG pathway enrichment was determined by a hypergeometric test following Yu *et al.* [24]. Additionally, protein-protein interaction networks for DEPs were explored using the publicly available Search Tool for the Retrieval of Interacting Genes/Proteins (STRING) database [25].

## Quantitative real-time PCR analysis

We selected genes from the DEPs of developing and mature flowers to validate the high throughput data at a transcriptional level by qRT-PCR. GAPDH (glyceraldehyde-3-phosphate dehydrogenase) was used as a reference gene and the primers used in this study are listed in [S1 Table](#). We added 10  $\mu$ L 2 $\times$  Master Mix, 0.6  $\mu$ L 10  $\mu$ M forward primer, 0.6  $\mu$ L 10  $\mu$ M reverse primer, 0.8  $\mu$ L complementary DNA (cDNA) template reverse transcribed to a PCR reaction system (Fermentas), and enough diethyl pyrocarbonate water for a total volume of 20  $\mu$ L. A Stepone Plus thermocycler was used (Applied Biosystems, Foster City, CA). The amplification protocol consisted of 95°C denaturation for 10 min; 40 cycles of 95°C for 15 s, 60°C for 30 s, and 72°C for 15 s, and 95°C for 15 s, 60°C 1 min, and 95°C 15 s for a melting curve and PCR specificity test. The analysis was performed using two independent cDNA preparations in triplicate PCR reactions. The relative expression ratio was calculated using the  $2^{-\Delta\Delta C_t}$  method [26] with eggplant *GAPDH* as the internal reference gene.

## Results

### Phenotypic differences between L-morph and S-morph flowers in eggplant

Heterostyly is a type of flower polymorphism that leads to separation of the stigma and anthers (herkogamy), preventing self-pollination, and is widely distributed in angiosperms [1,27,28]. In this study, two morphologically different types of flowers, L-morph and S-morph, were observed at different developmental stages in eggplant. As shown in [Fig 1A](#), the flowers are clearly different, especially in their pistil length. During flower development, the pistil length increased linearly with flower bud length in L-morph flowers ( $R^2 = 0.974$ ) ([Fig 1B](#)). Although the S-morph flowers experienced similar growth when the pistil length was less than 10 mm ( $R^2 = 0.968$ ), the pistil generally did not elongate when the buds were more than 10 mm long

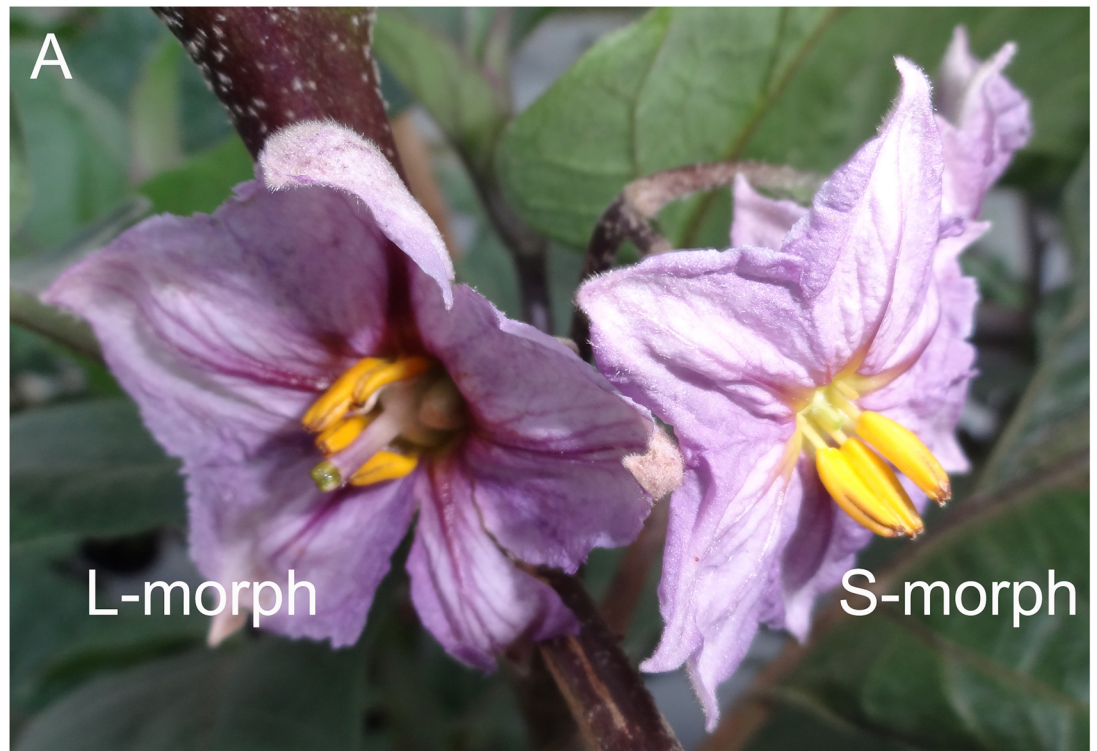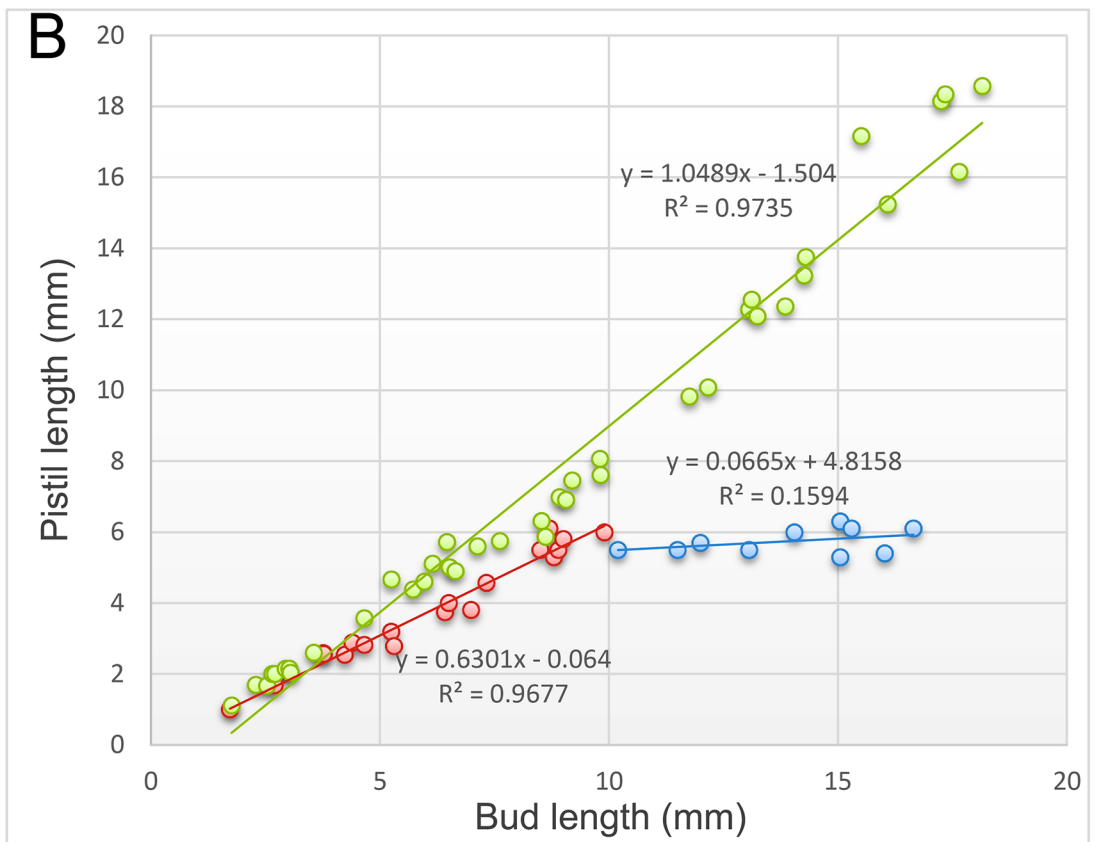

**Fig 1. L-morph and S-morph flowers and correlation between pistil length and flower bud length during development.** (A) Overview of L-morph and S-morph flowers. (B) The relationship between pistil length and flower bud

in L-morph and S-morph flowers. The green dots indicate the relationship between bud length and pistil length in L-morph flowers. In S-morph flowers, the relationship is indicated in red when bud length < 10 mm and blue when bud length > 10 mm.

<https://doi.org/10.1371/journal.pone.0179018.g001>

(Fig 1B, indicated in blue). Accordingly, we divided the pistil development of S-morph flowers into two stages, development and maturity. The former stage was present until approximately 10 DAB, after which pistils were considered mature. During the maturity stage, the S-morph flowers were significantly different from the L-morph flowers, regardless of bud length.

## Characterization of self- and cross-pollination of L-morph and S-morph flowers

Fig 2A shows that no obvious pollen germination occurred 1 h after self-pollination of L-morph flowers, but the pollen adhered well to the stigma. Pollen tubes germinated well 4 h after pollination (Fig 2B). With time, pollen tube elongation and germination increased (Fig 2C). However, after self-pollination of S-morph flowers, the pollen failed to germinate, and not as much pollen adhered to the stigma (Fig 2D, 2E and 2F), indicating incompatibility in self-pollination. Hence, compared with the L-morph flowers, pollen does not adhere as well to the stigma of S-morph flowers.

To determine whether the germination failure of pollen in S-morph flowers originated with the pollen or pistil, we reciprocally cross-pollinated L-morph and S-morph flowers. Germination occurred 24 h after cross-pollination of S-morph pollen to L-morph stigmas (Fig 2G). S-morph pollen germinated and pollen tubes grew normally on the stigmas of L-morph flowers, which suggested that of pollen from S-morph flowers can function normally. However, no obvious germination occurred 24 h after cross-pollination of L-morph pollen to S-morph stigmas (Fig 2H). No penetration of pollen tubes into the short style was detected, nor did any pollen grains germinate on the stigma. Given that the pollen of L-morph flowers can effectively germinate on L-morph flowers, this may indicate that the failure of pollen germination stems from the S-morph stigmas. Therefore, we inferred that the structure of the stigmatic surface in S-morph flowers may inhibit pollen germination, and the lower fruit set of S-morph flowers may reflect a shift toward functionally staminate flowers.

## Structural observations of pistils in L-morph and S-morph flowers

We examined eggplant embryo sacs of both S-morph and L-morph flowers from budding to blooming to better understand early embryonic development and compare the structural integrity of egg cells, central cells, antipodal cells, and synergids (Fig 3). The egg cell and two synergids were located at the micropylar end of the nucellus. The central cell occupied the majority of the embryo sac. Three smaller antipodal cells were located at the chalazal end. The structure of embryo sacs from S-morph and L-morph flowers did not differ; we therefore inferred that low fertilization rates of S-morph flowers probably resulted from stigmatic incompatibility, rather than defects in the embryo sac.

## Protein identification overview

We conducted a comparative proteome survey using the iTRAQ technique to detect molecular expression differences between S-morph and L-morph flowers during heterostyly development. We identified 16,460 high-quality unique peptides from 346,625 secondary spectra. We searched the Eggplant Genome DataBase (<http://eggplant.kazusa.or.jp/>) [29] and compared the peptides with predicted proteins using Mascot 2.3.02, identifying 4,728 proteins (S2A Fig).

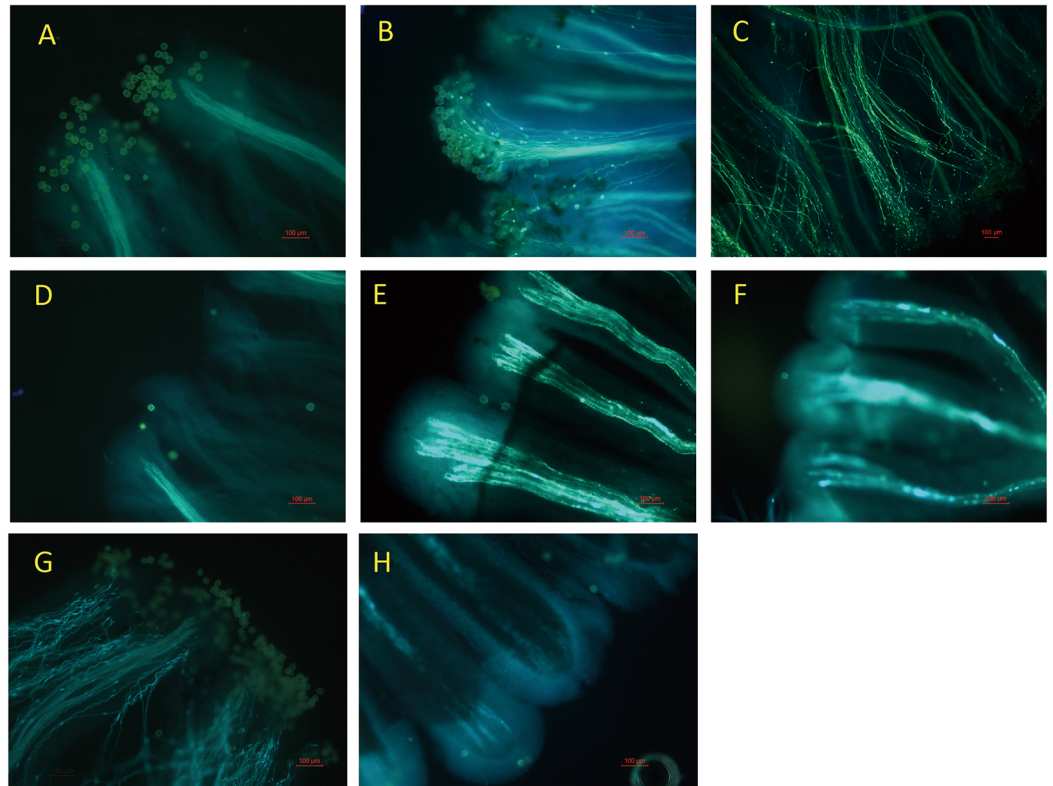

**Fig 2. Microspore germination on stigmas after self- or cross-pollination.** A, B and C show microspore germination on stigmas at 1 h, 4 h, or 24 h after L-morph flower self-pollination. D, E and F show microspore germination on stigmas at 1 h, 4 h, or 24 h after S-morph flower self-pollination. G show microspore germination on stigmas at 24 h after cross-pollination of S-morph pollen to L-morph stigma. H show microspore germination on stigmas at 24 h after cross-pollination of L-morph pollen to S-morph stigma. Scale bar = 100  $\mu$ m.

<https://doi.org/10.1371/journal.pone.0179018.g002>

We classified 16,460 peptides in 42 categories based on peptide length; the most frequent category (~10%) was 9–11 amino acids (S2B Fig). The majority of the 4,728 identified proteins included fewer than 10 peptides, and as the peptide number increased, the number of corresponding proteins decreased (S2C Fig). All the proteins with a false discovery rate (FDR) less than 1% were included in downstream analyses including (GO, Cluster of Orthologous Groups of proteins (COG) and KEGG Pathway).

COG is a database that is generated by comparing predicted and known proteins in all completely sequenced genomes to infer sets of orthologs. We compared proteins in our study with the COG database to predict possible functions and conduct a functional classification analysis (S3A Fig). The 4,728 identified proteins were categorized as involved in post-translational modification, protein turnover, chaperone functions, translation, ribosomal structure and biogenesis, carbohydrate metabolism and transport, energy production and conversion, and amino acid metabolism and transport. Additionally, many proteins ( $\geq 100$ ) were involved in lipid transport and metabolism, transcription, replication, recombination and repair, signal transduction mechanisms, cell wall/membrane/envelope biogenesis, secondary metabolite biosynthesis, transport, and catabolism.

GO is a community-based bioinformatics resource that standardizes descriptions of functions and classifies gene product functions through the use of structured, controlled vocabularies for associated biological processes, cellular components, and molecular functions. As shown in S3B Fig, the highest percentages of GO terms related to biological processes were



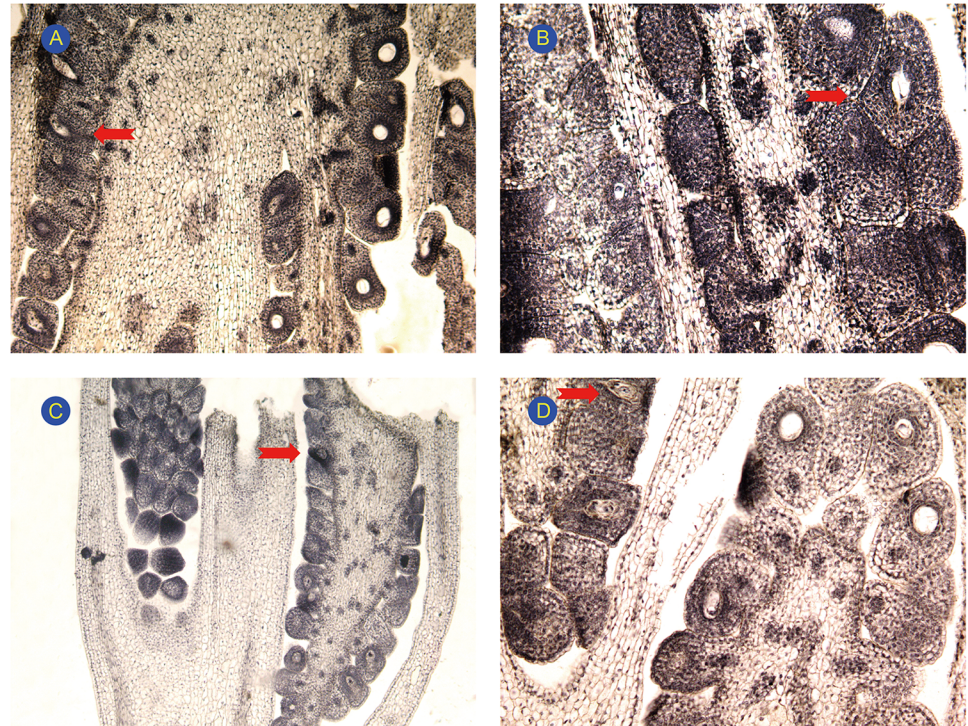

**Fig 3. Observation of the pistil development in L-morph and S-morph flowers.** (A) Central cells and disintegration of antipodal cells in maturing embryo sac of L-morph flower. (B) The two synergids in maturing embryo sac of L-morph flower. (C) Mitosis prophase of megasporocyte in S-morph flower. (D) The two synergids, one egg cell, and central cell in maturing embryo sac of S-morph flower.

<https://doi.org/10.1371/journal.pone.0179018.g003>

cellular progress, metabolism progress, and single-organism process, while those related to cellular components were cell, cell part, and organelle. The highest percentages of GO terms related to molecular functions were binding and catalytic activity.

The KEGG pathway database is a collection of pathway maps representing our knowledge of molecular interaction and reaction networks [23]. A total of 135 pathways were annotated for 3,380 of the 4,728 proteins. More than 5% of the identified proteins belonged to pathways of metabolism, biosynthesis of secondary metabolites, carbon metabolism, and biosynthesis of amino acids (S3C Fig).

### Analysis of protein expression patterns in L-morph and S-morph flowers during development and maturity

Here, we defined proteins with expression level fold changes  $> 1.5$  and  $p$ -values  $< 0.05$  as DEPs. We analyzed protein expression levels in the pistils of both L-morph and S-morph flowers during development (0–6 DAB) and discovered 24 downregulated and 33 upregulated proteins in S-morph flowers compared with L-morph flowers (Tables 1 and 2). Alanine-glyoxylate aminotransferase 2 (AGT2) homolog 3 (mitochondrial-like) had the greatest downregulation. AGT2 is a peroxisomal photorespiratory enzyme that catalyzes transamination reactions with multiple substrates [30]. Agamous-like MADS-box protein AGL61-like had the greatest upregulation. During maturity (13 DAB), 83 proteins were upregulated and 101 were downregulated in S-morph flowers compared with L-morph flowers (Tables 3 and 4). Polyubiquitin-like had the greatest downregulation. Interestingly, pistil extension-like protein (Sme2.5\_02187.1\_g00002.1) was downregulated in S-morph flowers during maturity, which

**Table 1. Upregulated proteins in pistils of S-morph flowers with a 1.5-fold change compared with L-morph flowers during development.**

| Protein_ID              | Description                                                                                     | Mass      | Coverage | Peptide | Fold change | Qvalue |
|-------------------------|-------------------------------------------------------------------------------------------------|-----------|----------|---------|-------------|--------|
| Sme2.5_03854.1_g00004.1 | uncharacterized protein LOC543817                                                               | 25718.33  | 0.037    | 1       | 2.974       | 0.047  |
| Sme2.5_04037.1_g00003.1 | glutelin type-A 2-like                                                                          | 28656.76  | 0.342    | 2       | 1.546       | 0.002  |
| Sme2.5_06391.1_g00003.1 | cyclic nucleotide-gated ion channel 1-like                                                      | 13069.66  | 0.088    | 1       | 3.793       | 0.035  |
| Sme2.5_05614.1_g00005.1 | lysosomal beta glucosidase-like                                                                 | 37057.35  | 0.226    | 5       | 1.557       | 0.002  |
| Sme2.5_13401.1_g00002.1 | uncharacterized protein At1g47420, mitochondrial-like isoform 2                                 | 31502.39  | 0.301    | 1       | 3.326       | 0.002  |
| Sme2.5_04699.1_g00005.1 | profilin-1-like                                                                                 | 17863.69  | 0.390    | 4       | 2.005       | 0.050  |
| Sme2.5_00368.1_g00010.1 | 4-coumarate—CoA ligase-like 1-like                                                              | 61656.04  | 0.215    | 9       | 1.587       | 0.002  |
| Sme2.5_14644.1_g00002.1 | predicted protein                                                                               | 12132.46  | 0.339    | 3       | 2.163       | 0.002  |
| Sme2.5_09858.1_g00002.1 | ribulose-1,5-bisphosphate carboxylase/oxygenase large subunit                                   | 21021.44  | 0.074    | 1       | 1.552       | 0.006  |
| Sme2.5_00346.1_g00019.1 | chalcone synthase-like                                                                          | 44007.60  | 0.295    | 8       | 1.528       | 0.016  |
| Sme2.5_01611.1_g00010.1 | H1 histone-like protein                                                                         | 21647.19  | 0.095    | 2       | 1.861       | 0.003  |
| Sme2.5_00572.1_g00010.1 | alpha-DOX2                                                                                      | 63593.44  | 0.034    | 2       | 1.607       | 0.028  |
| Sme2.5_12240.1_g00001.1 | uncharacterized protein LOC101306013                                                            | 114772.3  | 0.028    | 2       | 4.052       | 0.017  |
| Sme2.5_04401.1_g00002.1 | protein HOTHEAD-like                                                                            | 54469.65  | 0.216    | 8       | 1.985       | 0.002  |
| Sme2.5_08304.1_g00001.1 | profilin-1                                                                                      | 14120.02  | 0.546    | 5       | 1.789       | 0.002  |
| Sme2.5_07601.1_g00002.1 | hypothetical protein VITISV_035070                                                              | 47141.44  | 0.017    | 1       | 1.512       | 0.002  |
| Sme2.5_04937.1_g00002.1 | agamous-like MADS-box protein AGL61-like                                                        | 13234.40  | 0.068    | 1       | 7.349       | 0.002  |
| Sme2.5_03454.1_g00001.1 | probable sarcosine oxidase-like                                                                 | 45726.07  | 0.169    | 6       | 1.971       | 0.003  |
| Sme2.5_00048.1_g00028.1 | uncharacterized protein LOC101250105                                                            | 63267.26  | 0.227    | 12      | 1.661       | 0.002  |
| Sme2.5_04309.1_g00005.1 | HMG1/2-like protein-like isoform 2                                                              | 15804.77  | 0.486    | 2       | 1.592       | 0.012  |
| Sme2.5_03497.1_g00004.1 | uncharacterized protein LOC101243982                                                            | 21283.66  | 0.043    | 1       | 1.937       | 0.006  |
| Sme2.5_04891.1_g00002.1 | tetraketide alpha-pyrone reductase 2-like                                                       | 30261.27  | 0.078    | 2       | 1.686       | 0.002  |
| Sme2.5_07446.1_g00003.1 | ribulose-1,5-bisphosphate carboxylase/oxygenase large subunit                                   | 21375.91  | 0.117    | 1       | 1.585       | 0.005  |
| Sme2.5_03231.1_g00008.1 | Ribulose bisphosphate carboxylase small chain 8B                                                | 20647.18  | 0.494    | 1       | 1.524       | 0.005  |
| Sme2.5_00468.1_g00005.1 | GDSL esterase/lipase At2g31540-like                                                             | 39023.43  | 0.038    | 1       | 3.477       | 0.043  |
| Sme2.5_04260.1_g00006.1 | heterodimeric geranylgeranyl pyrophosphate synthase small subunit, chloroplastic-like isoform 1 | 34534.52  | 0.166    | 4       | 1.580       | 0.002  |
| Sme2.5_05063.1_g00001.1 | polygalacturonase QRT3-like                                                                     | 104455.70 | 0.198    | 15      | 1.976       | 0.002  |
| Sme2.5_04696.1_g00006.1 | subtilisin-like protease-like                                                                   | 65871.21  | 0.191    | 10      | 1.787       | 0.002  |
| Sme2.5_21483.1_g00001.1 | cysteine-rich receptor-like protein kinase 10-like                                              | 40578.25  | 0.019    | 1       | 1.756       | 0.010  |
| Sme2.5_06878.1_g00001.1 | cytochrome P450 704C1-like                                                                      | 59002.25  | 0.060    | 3       | 1.800       | 0.002  |
| Sme2.5_00049.1_g00003.1 | early nodulin-like protein 1-like                                                               | 18748.54  | 0.179    | 2       | 2.689       | 0.006  |
| Sme2.5_09669.1_g00005.1 | beta-glucosidase 40-like                                                                        | 57747.89  | 0.222    | 11      | 2.028       | 0.002  |
| Sme2.5_31247.1_g00001.1 | hypothetical protein VITISV_027379                                                              | 23536.02  | 0.173    | 1       | 1.709       | 0.023  |

<https://doi.org/10.1371/journal.pone.0179018.t001>

may indicate that the short pistil of S-morph flowers is related to its lower expression level. Pectinesterase 2-like was the top differentially upregulated protein. Additionally, during flower maturity, the expression levels of cysteine proteinase and peroxidase, which are involved in senescence and programmed cell death [31], were upregulated in S-morph flowers, which might contribute to the failure of S-morph flowers to set fruit. We found that methionine sulf-oxide reductase A3 in S-morph flowers, which is involved in the response to oxidative stress [32], was downregulated during both flower development and maturity compared with L-morph flowers. Moreover, the cysteine proteinase expression level increased in S-morph pistils and was probably related to cell apoptosis.

We compared expression differences of L-morph and S-morph pistils between development and maturity. For L-morph flowers, there were 322 upregulated and 322 downregulated

**Table 2. Downregulated proteins in pistils of S-morph flowers with a 1.5-fold change compared with L-morph flowers during development.**

| Protein_ID              | Description                                                                        | Mass      | Coverage | Peptide | Fold change | Qvalue |
|-------------------------|------------------------------------------------------------------------------------|-----------|----------|---------|-------------|--------|
| Sme2.5_03906.1_g00010.1 | bifunctional monodehydroascorbate reductase and carbonic anhydrase nectarin-3-like | 29618.23  | 0.110    | 1       | 0.400       | 0.003  |
| Sme2.5_24823.1_g00001.1 | uncharacterized protein At1g47420, mitochondrial-like isoform 2                    | 24316.70  | 0.388    | 1       | 0.501       | 0.008  |
| Sme2.5_03184.1_g00003.1 | Putative gag-pol polyprotein, identical                                            | 173316.10 | 0.009    | 1       | 0.149       | 0.020  |
| Sme2.5_04111.1_g00005.1 | citrate binding protein                                                            | 21111.52  | 0.228    | 4       | 0.621       | 0.002  |
| Sme2.5_04984.1_g00003.1 | proteinase inhibitor II                                                            | 25168.62  | 0.333    | 5       | 0.576       | 0.002  |
| Sme2.5_10015.1_g00002.1 | basic 30 kDa endochitinase-like                                                    | 38015.66  | 0.162    | 3       | 0.556       | 0.002  |
| Sme2.5_03742.1_g00003.1 | Glycosyl hydrolases family 17 protein                                              | 44096.32  | 0.087    | 3       | 0.663       | 0.006  |
| Sme2.5_08975.1_g00004.1 | uncharacterized protein LOC101252371                                               | 94859.44  | 0.011    | 1       | 0.291       | 0.048  |
| Sme2.5_00235.1_g00003.1 | ribonuclease 3-like                                                                | 24947.69  | 0.156    | 4       | 0.642       | 0.002  |
| Sme2.5_02047.1_g00009.1 | miraculin-like, partial                                                            | 23253.65  | 0.103    | 2       | 0.623       | 0.002  |
| Sme2.5_01085.1_g00002.1 | probable leucine-rich repeat receptor-like protein kinase At1g35710-like           | 71005.38  | 0.224    | 11      | 0.656       | 0.002  |
| Sme2.5_00512.1_g00007.1 | bifunctional monodehydroascorbate reductase and carbonic anhydrase nectarin-3-like | 28298.46  | 0.586    | 9       | 0.562       | 0.002  |
| Sme2.5_00275.1_g00003.1 | desiccation-related protein PCC13-62-like                                          | 34154.37  | 0.070    | 2       | 0.617       | 0.021  |
| Sme2.5_00345.1_g00027.1 | alanine—glyoxylate aminotransferase 2 homolog 3, mitochondrial-like                | 28097.52  | 0.044    | 1       | 0.100       | 0.013  |
| Sme2.5_08282.1_g00001.1 | DNA-damage-repair/toleration protein DRT100-like                                   | 40864.38  | 0.198    | 6       | 0.450       | 0.002  |
| Sme2.5_00008.1_g00037.1 | probable inactive receptor kinase At1g48480-like                                   | 70601.67  | 0.131    | 5       | 0.489       | 0.014  |
| Sme2.5_02193.1_g00001.1 | cysteine protease inhibitor 8-like                                                 | 34677.99  | 0.144    | 3       | 0.423       | 0.002  |
| Sme2.5_31478.1_g00001.1 | acidic 27 kDa endochitinase precursor                                              | 18447.83  | 0.182    | 1       | 0.555       | 0.008  |
| Sme2.5_28714.1_g00002.1 | class II chitinase                                                                 | 27594.14  | 0.268    | 3       | 0.550       | 0.002  |
| Sme2.5_03276.1_g00004.1 | trypsin proteinase inhibitor precursor                                             | 25387.60  | 0.330    | 5       | 0.573       | 0.002  |
| Sme2.5_01810.1_g00004.1 | ubiquilin-2-like                                                                   | 35661.56  | 0.061    | 1       | 0.281       | 0.047  |
| Sme2.5_00001.1_g00016.1 | wound-inducible carboxypeptidase precursor                                         | 50648.16  | 0.052    | 2       | 0.664       | 0.002  |
| Sme2.5_07601.1_g00001.1 | methionine sulfoxide reductase A3                                                  | 35147.93  | 0.030    | 1       | 0.455       | 0.013  |
| Sme2.5_00745.1_g00004.1 | peroxidase 17-like                                                                 | 35460.50  | 0.280    | 8       | 0.542       | 0.002  |

<https://doi.org/10.1371/journal.pone.0179018.t002>

genes during maturity compared with development (S2 and S3 Tables). Among upregulated proteins, ole1-like protein-like, fasciclin-like arabinogalactan protein 14-like, profilin-1-like, profilin-1, and cysteine proteinase 3-like, had the highest expression differences (S2 Table). Pectinesterase 2-like was the top differentially upregulated protein. Other proteins, such as nonspecific lipid-transfer protein-like protein At2g13820-like were differentially downregulated (S3 Table). In S-morph flowers, there were 446 upregulated and 550 downregulated genes during maturity compared with development (S4 and S5 Tables). Ole1-like protein-like, nucleoside diphosphate kinase IV, pectinesterase 2-like, profilin-1, and other proteins were the top differentially upregulated proteins (S4 Table). Many downregulated proteins, such as histone H1, ubiquitin extension protein, and cyclic nucleotide-gated ion channel 1-like, had significant expression changes (S5 Table). Pistil extension-like protein was upregulated in L-morph flower pistils from development to maturity but showed no expression difference in S-morph flowers. In S-morph and L-morph flowers, suberization-associated anionic peroxidase 2, which may play an important role in cell wall suberization, superoxide elimination, and oxidative stress response [33,34], was upregulated. We also found that cinnamoyl-CoA reductase, which participates in lignin biosynthesis, was downregulated in both S-morph and L-morph flowers [35].

**Table 3. Upregulated proteins in pistils of S-morph flowers with a 1.5-fold change compared with L-morph flowers during maturity.**

| Protein_ID              | Description                                                               | Mass      | Coverage | Peptide | Fold change | Qvalue |
|-------------------------|---------------------------------------------------------------------------|-----------|----------|---------|-------------|--------|
| Sme2.5_02083.1_g00006.1 | putative pectinesterase/pectinesterase inhibitor 28-like                  | 60660.48  | 0.078    | 4       | 3.158       | 0.001  |
| Sme2.5_00076.1_g00003.1 | leucine-rich repeat extensin-like protein 3-like                          | 56883.38  | 0.064    | 3       | 1.630       | 0.003  |
| Sme2.5_00016.1_g00015.1 | hypothetical protein VITISV_019164                                        | 13394.11  | 0.234    | 2       | 1.921       | 0.001  |
| Sme2.5_00188.1_g00008.1 | ATP synthase subunit delta', mitochondrial-like isoform 1                 | 14509.35  | 0.188    | 2       | 1.607       | 0.001  |
| Sme2.5_02533.1_g00006.1 | olee1-like protein-like                                                   | 19924.59  | 0.114    | 2       | 5.121       | 0.001  |
| Sme2.5_00086.1_g00012.1 | SIArf/Xyl3                                                                | 69479.43  | 0.198    | 9       | 3.777       | 0.001  |
| Sme2.5_05092.1_g00005.1 | fasciclin-like arabinogalactan protein 14-like                            | 18313.54  | 0.124    | 2       | 2.038       | 0.001  |
| Sme2.5_00944.1_g00019.1 | Blue copper protein precursor, putative                                   | 25228.61  | 0.071    | 1       | 1.510       | 0.001  |
| Sme2.5_05878.1_g00004.1 | unknown                                                                   | 27148.47  | 0.029    | 1       | 2.164       | 0.001  |
| Sme2.5_06660.1_g00003.1 | uncharacterized protein LOC101266493 isoform 1                            | 20375.65  | 0.173    | 3       | 2.523       | 0.001  |
| Sme2.5_00377.1_g00016.1 | subtilisin-like protease-like                                             | 83322.67  | 0.147    | 10      | 1.527       | 0.001  |
| Sme2.5_03383.1_g00005.1 | late embryogenesis abundant protein 1-like                                | 9375.45   | 0.409    | 2       | 4.441       | 0.001  |
| Sme2.5_05238.1_g00003.1 | unknown                                                                   | 16150.91  | 0.071    | 1       | 2.397       | 0.001  |
| Sme2.5_02369.1_g00001.1 | peroxidase N-like isoform 1                                               | 29230.45  | 0.151    | 2       | 1.855       | 0.038  |
| Sme2.5_06507.1_g00004.1 | serine carboxypeptidase-like 45-like                                      | 57255.26  | 0.032    | 1       | 3.267       | 0.003  |
| Sme2.5_00817.1_g00004.1 | endonuclease 2-like                                                       | 32347.73  | 0.283    | 6       | 1.657       | 0.001  |
| Sme2.5_05614.1_g00005.1 | lysosomal beta glucosidase-like                                           | 37057.35  | 0.226    | 5       | 2.105       | 0.001  |
| Sme2.5_07124.1_g00003.1 | beta-D-xylosidase 1 precursor                                             | 84376.62  | 0.081    | 4       | 2.834       | 0.001  |
| Sme2.5_07880.1_g00001.1 | glucan endo-1,3-beta-glucosidase 8-like                                   | 85413.96  | 0.037    | 3       | 3.656       | 0.001  |
| Sme2.5_01196.1_g00005.1 | ribokinase-like                                                           | 43914.26  | 0.098    | 3       | 1.611       | 0.004  |
| Sme2.5_13401.1_g00002.1 | uncharacterized protein At1g47420, mitochondrial-like isoform 2           | 31502.39  | 0.301    | 1       | 5.725       | 0.001  |
| Sme2.5_03722.1_g00006.1 | anther-specific protein LAT52-like                                        | 18412.04  | 0.057    | 1       | 6.641       | 0.001  |
| Sme2.5_04699.1_g00005.1 | profilin-1-like                                                           | 17863.69  | 0.390    | 4       | 2.996       | 0.001  |
| Sme2.5_06227.1_g00005.1 | late embryogenesis abundant protein D-34-like                             | 22191.38  | 0.611    | 10      | 1.554       | 0.001  |
| Sme2.5_01431.1_g00003.1 | Putative retrotransposon protein, identical                               | 86414.53  | 0.044    | 3       | 1.980       | 0.001  |
| Sme2.5_05048.1_g00002.1 | uncharacterized protein LOC101265833                                      | 9975.86   | 0.182    | 1       | 2.263       | 0.001  |
| Sme2.5_07288.1_g00002.1 | UMP/CMP kinase-like                                                       | 22910.57  | 0.236    | 4       | 1.682       | 0.001  |
| Sme2.5_02324.1_g00010.1 | GDSL esterase/lipase At4g01130-like                                       | 40249.09  | 0.091    | 3       | 1.751       | 0.020  |
| Sme2.5_04547.1_g00002.1 | probable LRR receptor-like serine/threonine-protein kinase At1g06840-like | 106411.20 | 0.040    | 3       | 1.508       | 0.001  |
| Sme2.5_00701.1_g00012.1 | germin-like protein subfamily 1 member 15-like                            | 24697.72  | 0.507    | 7       | 1.626       | 0.001  |
| Sme2.5_12877.1_g00001.1 | subtilisin-like protease precursor                                        | 112544.00 | 0.101    | 5       | 1.502       | 0.004  |
| Sme2.5_00223.1_g00004.1 | polygalacturonase-like                                                    | 72678.90  | 0.078    | 4       | 4.050       | 0.011  |
| Sme2.5_02955.1_g00005.1 | unknown                                                                   | 38980.04  | 0.623    | 9       | 1.640       | 0.001  |
| Sme2.5_05245.1_g00001.1 | uncharacterized protein LOC101249738                                      | 37417.26  | 0.074    | 2       | 4.382       | 0.001  |
| Sme2.5_00827.1_g00004.1 | uncharacterized protein At4g13230-like                                    | 13245.75  | 0.107    | 1       | 2.598       | 0.002  |
| Sme2.5_01764.1_g00007.1 | GDSL esterase/lipase APG-like                                             | 39003.76  | 0.312    | 7       | 1.712       | 0.001  |
| Sme2.5_03252.1_g00002.1 | probable polygalacturonase-like                                           | 49657.64  | 0.051    | 2       | 5.815       | 0.001  |
| Sme2.5_14644.1_g00002.1 | predicted protein                                                         | 12132.46  | 0.339    | 3       | 2.409       | 0.001  |
| Sme2.5_00588.1_g00013.1 | uncharacterized protein LOC101253861                                      | 27398.90  | 0.232    | 4       | 1.517       | 0.049  |
| Sme2.5_00015.1_g00020.1 | flavanone 3-hydroxylase                                                   | 41376.09  | 0.331    | 9       | 1.680       | 0.001  |
| Sme2.5_14501.1_g00004.1 | uncharacterized protein At5g39570-like                                    | 26376.08  | 0.096    | 2       | 2.237       | 0.001  |
| Sme2.5_04720.1_g00004.1 | GDSL esterase/lipase At1g29670-like                                       | 37336.80  | 0.024    | 1       | 6.425       | 0.036  |
| Sme2.5_02824.1_g00005.1 | Anther-specific protein LAT52                                             | 18507.87  | 0.180    | 3       | 5.440       | 0.002  |
| Sme2.5_00188.1_g00003.1 | pectinesterase 2-like                                                     | 41033.75  | 0.128    | 2       | 7.812       | 0.001  |
| Sme2.5_07102.1_g00002.1 | unknown                                                                   | 20846.97  | 0.077    | 1       | 1.570       | 0.024  |
| Sme2.5_02098.1_g00007.1 | uncharacterized protein LOC101243814 isoform 1                            | 16188.35  | 0.140    | 1       | 1.959       | 0.006  |

(Continued)

Table 3. (Continued)

| Protein_ID              | Description                                                     | Mass      | Coverage | Peptide | Fold change | Qvalue |
|-------------------------|-----------------------------------------------------------------|-----------|----------|---------|-------------|--------|
| Sme2.5_02947.1_g00002.1 | uncharacterized protein LOC101267484                            | 96934.38  | 0.014    | 1       | 1.640       | 0.004  |
| Sme2.5_00864.1_g00008.1 | oryzain alpha chain-like                                        | 20763.01  | 0.364    | 5       | 1.525       | 0.001  |
| Sme2.5_08304.1_g00001.1 | profilin-1                                                      | 14120.02  | 0.546    | 5       | 2.950       | 0.001  |
| Sme2.5_19379.1_g00002.1 | non-specific lipid-transfer protein 2-like isoform 1            | 8960.47   | 0.171    | 2       | 2.615       | 0.001  |
| Sme2.5_00041.1_g00026.1 | non-specific lipid-transfer protein-like protein At2g13820-like | 17325.40  | 0.048    | 1       | 1.987       | 0.008  |
| Sme2.5_12729.1_g00004.1 | lysosomal beta glucosidase-like                                 | 66678.06  | 0.121    | 5       | 2.821       | 0.001  |
| Sme2.5_01937.1_g00005.1 | uncharacterized protein LOC101247575                            | 80431.09  | 0.334    | 18      | 1.523       | 0.001  |
| Sme2.5_00086.1_g00011.1 | SlArf/Xyl3                                                      | 84328.53  | 0.245    | 12      | 1.618       | 0.001  |
| Sme2.5_01618.1_g00012.1 | probable pectinesterase/pectinesterase inhibitor 51-like        | 59777.45  | 0.082    | 2       | 1.824       | 0.049  |
| Sme2.5_05314.1_g00003.1 | Putative gag-pol polyprotein, identical                         | 116417.80 | 0.005    | 1       | 2.118       | 0.029  |
| Sme2.5_00768.1_g00018.1 | cysteine proteinase 3-like                                      | 40377.92  | 0.253    | 8       | 2.372       | 0.001  |
| Sme2.5_03583.1_g00006.1 | brassinosteroid-regulated protein BRU1                          | 29952.77  | 0.086    | 1       | 2.474       | 0.002  |
| Sme2.5_00740.1_g00010.1 | denticleless protein homolog A-like                             | 167057.90 | 0.042    | 6       | 1.534       | 0.036  |
| Sme2.5_08226.1_g00002.1 | glycine-rich RNA-binding protein-like                           | 15970.37  | 0.362    | 3       | 1.560       | 0.001  |
| Sme2.5_00225.1_g00038.1 | somatic embryogenesis receptor kinase 3B precursor              | 64125.90  | 0.040    | 2       | 1.572       | 0.012  |
| Sme2.5_00188.1_g00007.1 | ATP synthase subunit delta', mitochondrial-like isoform 1       | 14320.49  | 0.272    | 2       | 1.684       | 0.001  |
| Sme2.5_00019.1_g00028.1 | vicilin-like antimicrobial peptides 2-2-like                    | 51626.04  | 0.236    | 9       | 1.693       | 0.001  |
| Sme2.5_01638.1_g00005.1 | anthocyanin synthase                                            | 47089.86  | 0.151    | 4       | 1.715       | 0.006  |
| Sme2.5_04773.1_g00002.1 | uncharacterized protein LOC101263984                            | 17506.54  | 0.213    | 3       | 1.566       | 0.001  |
| Sme2.5_05293.1_g00002.1 | L-ascorbate oxidase homolog isoform 1                           | 62790.74  | 0.155    | 6       | 2.669       | 0.001  |
| Sme2.5_00915.1_g00003.1 | peptidyl-prolyl cis-trans isomerase-like                        | 18253.00  | 0.390    | 4       | 1.886       | 0.001  |
| Sme2.5_00188.1_g00004.1 | LOW QUALITY PROTEIN: pectinesterase 1-like                      | 34995.54  | 0.200    | 3       | 4.202       | 0.001  |
| Sme2.5_02047.1_g00006.1 | Kunitz-type enzyme inhibitor S9C11                              | 23565.76  | 0.310    | 5       | 1.553       | 0.001  |
| Sme2.5_06455.1_g00005.1 | anther-specific protein LAT52-like                              | 19151.32  | 0.214    | 3       | 4.474       | 0.002  |
| Sme2.5_10801.1_g00001.1 | UTP—glucose-1-phosphate uridylyltransferase-like                | 47977.96  | 0.394    | 9       | 1.638       | 0.001  |
| Sme2.5_21483.1_g00001.1 | cysteine-rich receptor-like protein kinase 10-like              | 40578.25  | 0.019    | 1       | 2.946       | 0.002  |
| Sme2.5_04696.1_g00001.1 | expansin11 precursor                                            | 28233.41  | 0.156    | 4       | 1.544       | 0.001  |
| Sme2.5_10874.1_g00002.1 | uncharacterized protein At5g39570-like                          | 34605.10  | 0.951    | 19      | 2.100       | 0.001  |
| Sme2.5_02148.1_g00009.1 | UDP-glycosyltransferase 75D1-like                               | 48331.87  | 0.167    | 6       | 1.658       | 0.001  |
| Sme2.5_00170.1_g00013.1 | uncharacterized protein LOC101251668                            | 14895.89  | 0.104    | 1       | 2.611       | 0.002  |
| Sme2.5_10869.1_g00001.1 | uncharacterized protein LOC101258533                            | 6962.28   | 0.273    | 1       | 3.316       | 0.003  |
| Sme2.5_26344.1_g00001.1 | uncharacterized protein LOC101260800                            | 55494.69  | 0.042    | 2       | 2.110       | 0.001  |
| Sme2.5_00100.1_g00024.1 | polygalacturonase inhibiting protein                            | 119649.20 | 0.172    | 16      | 1.630       | 0.001  |
| Sme2.5_02584.1_g00008.1 | 8-hydroxygeraniol dehydrogenase                                 | 39249.74  | 0.231    | 3       | 1.585       | 0.012  |
| Sme2.5_31247.1_g00001.1 | hypothetical protein VITISV_027379                              | 23536.02  | 0.173    | 1       | 3.330       | 0.001  |
| Sme2.5_00813.1_g00013.1 | uncharacterized protein LOC101258525                            | 92237.69  | 0.035    | 3       | 1.696       | 0.009  |
| Sme2.5_24838.1_g00001.1 | methionine sulfoxide reductase                                  | 9728.64   | 0.429    | 3       | 2.178       | 0.005  |

<https://doi.org/10.1371/journal.pone.0179018.t003>

To test pistil protein expression levels of messenger RNA (mRNA) transcript differences between L-morph and S-morph flowers and validate the iTRAQ results, we selected nine genes for mRNA qRT-PCR analysis from DAB 0, 3, 6, 10, and 13 of both L-morph and S-morph pistils. As shown in Fig 4, except for Sme2.5\_06391.1\_g00003.1 and Sme2.5\_13401.1\_g00002.1, the expression of the other seven genes agreed well with our iTRAQ results from developing and mature flowers, suggesting that most proteins were regulated directly at the transcriptional level. The expression patterns of the two exceptions at the protein and mRNA levels were not consistent with the iTRAQ results during development but were consistent during maturity.

**Table 4. Downregulated proteins in pistils of S-morph flowers with a 1.5-fold change compared with L-morph flowers during maturity.**

| Protein_ID              | Description                                                     | Mass     | Coverage | Peptide | Fold change | Qvalue |
|-------------------------|-----------------------------------------------------------------|----------|----------|---------|-------------|--------|
| Sme2.5_01984.1_g00005.1 | uncharacterized protein LOC100259659                            | 20913.66 | 0.166    | 2       | 0.467       | 0.034  |
| Sme2.5_00179.1_g00004.1 | probable protein phosphatase 2C 27-like                         | 67361.47 | 0.151    | 8       | 0.596       | 0.006  |
| Sme2.5_00758.1_g00014.1 | bifunctional purple acid phosphatase 26-like                    | 53891.56 | 0.197    | 6       | 0.527       | 0.002  |
| Sme2.5_30554.1_g00001.1 | cell wall peroxidase                                            | 15930.86 | 0.083    | 1       | 0.430       | 0.006  |
| Sme2.5_00676.1_g00001.1 | 60S ribosomal protein L7-4-like                                 | 27859.18 | 0.396    | 2       | 0.568       | 0.007  |
| Sme2.5_12039.1_g00002.1 | uncharacterized protein At5g01610-like isoform 2                | 23425.97 | 0.100    | 2       | 0.617       | 0.019  |
| Sme2.5_24823.1_g00001.1 | uncharacterized protein At1g47420, mitochondrial-like isoform 2 | 24316.70 | 0.388    | 1       | 0.431       | 0.017  |
| Sme2.5_03582.1_g00003.1 | proliferation-associated protein 2G4-like                       | 44958.26 | 0.282    | 7       | 0.499       | 0.001  |
| Sme2.5_21139.1_g00001.1 | uncharacterized protein LOC101257658                            | 47536.02 | 0.039    | 1       | 0.513       | 0.028  |
| Sme2.5_01559.1_g00002.1 | Histone H1                                                      | 30859.06 | 0.268    | 6       | 0.371       | 0.001  |
| Sme2.5_00343.1_g00001.1 | 40S ribosomal protein S28-like isoform 1                        | 14716.98 | 0.094    | 1       | 0.659       | 0.006  |
| Sme2.5_30393.1_g00001.1 | predicted protein                                               | 9834.22  | 0.182    | 2       | 0.407       | 0.011  |
| Sme2.5_01689.1_g00009.1 | LEA1-like protein                                               | 21992.52 | 0.107    | 2       | 0.620       | 0.015  |
| Sme2.5_01918.1_g00003.1 | 40S ribosomal protein S15-like                                  | 17241.40 | 0.318    | 3       | 0.539       | 0.004  |
| Sme2.5_03836.1_g00005.1 | ubiquitin extension protein                                     | 17859.54 | 0.391    | 1       | 0.280       | 0.018  |
| Sme2.5_06391.1_g00003.1 | cyclic nucleotide-gated ion channel 1-like                      | 13069.66 | 0.088    | 1       | 0.183       | 0.046  |
| Sme2.5_02104.1_g00006.1 | uncharacterized protein LOC101260453                            | 21674.39 | 0.111    | 1       | 0.391       | 0.001  |
| Sme2.5_00097.1_g00005.1 | methionine synthase                                             | 84904.88 | 0.656    | 33      | 0.646       | 0.001  |
| Sme2.5_01494.1_g00003.1 | 60S ribosomal protein L19-2-like                                | 24901.74 | 0.299    | 2       | 0.646       | 0.027  |
| Sme2.5_00026.1_g00018.1 | ribosomal protein PETRP-like                                    | 15530.16 | 0.422    | 3       | 0.658       | 0.001  |
| Sme2.5_00001.1_g00048.1 | cinnamic acid 4-hydroxylase                                     | 58331.85 | 0.244    | 12      | 0.640       | 0.001  |
| Sme2.5_09948.1_g00002.1 | 60S ribosomal protein L27a-3-like                               | 16468.95 | 0.236    | 2       | 0.663       | 0.027  |
| Sme2.5_00079.1_g00001.1 | uncharacterized protein LOC101244722                            | 21014.85 | 0.219    | 3       | 0.561       | 0.007  |
| Sme2.5_07653.1_g00001.1 | Threonine dehydratase biosynthetic, chloroplastic               | 67242.71 | 0.444    | 17      | 0.607       | 0.001  |
| Sme2.5_02268.1_g00004.1 | 60S ribosomal protein L21-2-like                                | 18730.14 | 0.354    | 1       | 0.549       | 0.005  |
| Sme2.5_01701.1_g00006.1 | 6,7-dimethyl-8-ribityllumazine synthase, chloroplastic-like     | 25211.79 | 0.129    | 2       | 0.662       | 0.006  |
| Sme2.5_00026.1_g00001.1 | glyceraldehyde 3-phosphate dehydrogenase                        | 38609.81 | 0.521    | 5       | 0.475       | 0.001  |
| Sme2.5_01674.1_g00010.1 | apoplasmic invertase                                            | 58606.65 | 0.109    | 4       | 0.661       | 0.004  |
| Sme2.5_23355.1_g00001.1 | Probable linoleate 9S-lipoxygenase 4                            | 79251.74 | 0.717    | 30      | 0.628       | 0.001  |
| Sme2.5_00065.1_g00022.1 | 1,2-dihydroxy-3-keto-5-methylthiopentene dioxygenase 2-like     | 23574.49 | 0.250    | 3       | 0.662       | 0.031  |
| Sme2.5_00942.1_g00003.1 | ribosomal protein S14-like protein                              | 16373.64 | 0.367    | 1       | 0.512       | 0.001  |
| Sme2.5_03872.1_g00005.1 | uncharacterized protein LOC101245049                            | 40572.39 | 0.122    | 4       | 0.600       | 0.005  |
| Sme2.5_00310.1_g00014.1 | 60S ribosomal protein L27a-3-like                               | 16430.90 | 0.372    | 4       | 0.573       | 0.001  |
| Sme2.5_06364.1_g00001.1 | 60S ribosomal protein L34-like isoform 1                        | 15618.94 | 0.294    | 2       | 0.652       | 0.006  |
| Sme2.5_02784.1_g00004.1 | unknown                                                         | 11296.75 | 0.118    | 1       | 0.122       | 0.032  |
| Sme2.5_00401.1_g00004.1 | thioredoxin H                                                   | 15726.95 | 0.176    | 2       | 0.641       | 0.014  |
| Sme2.5_00281.1_g00013.1 | ribosomal protein L3                                            | 44797.00 | 0.393    | 8       | 0.534       | 0.003  |
| Sme2.5_00265.1_g00010.1 | 40S ribosomal protein S25-2-like                                | 11914.60 | 0.361    | 4       | 0.423       | 0.001  |
| Sme2.5_00606.1_g00004.1 | dehydrin-like protein                                           | 24181.16 | 0.563    | 8       | 0.623       | 0.001  |
| Sme2.5_02632.1_g00002.1 | 40S ribosomal protein S9-2-like                                 | 23011.27 | 0.431    | 4       | 0.645       | 0.039  |
| Sme2.5_00108.1_g00014.1 | ly200 protein                                                   | 15727.59 | 0.135    | 1       | 0.413       | 0.003  |
| Sme2.5_06588.1_g00003.1 | 60S ribosomal protein L9-1-like                                 | 37687.69 | 0.473    | 6       | 0.657       | 0.001  |
| Sme2.5_08282.1_g00001.1 | DNA-damage-repair/toleration protein DRT100-like                | 40864.38 | 0.198    | 6       | 0.215       | 0.001  |
| Sme2.5_13015.1_g00001.1 | allene oxide cyclase                                            | 27112.76 | 0.125    | 1       | 0.468       | 0.009  |
| Sme2.5_00162.1_g00020.1 | threonine deaminase, partial                                    | 40661.78 | 0.445    | 3       | 0.591       | 0.001  |
| Sme2.5_02984.1_g00002.1 | polyubiquitin-like                                              | 44423.86 | 0.016    | 1       | 0.100       | 0.017  |
| Sme2.5_00008.1_g00037.1 | probable inactive receptor kinase At1g48480-like                | 70601.67 | 0.131    | 5       | 0.318       | 0.046  |

(Continued)

Table 4. (Continued)

| Protein_ID              | Description                                                      | Mass      | Coverage | Peptide | Fold change | Qvalue |
|-------------------------|------------------------------------------------------------------|-----------|----------|---------|-------------|--------|
| Sme2.5_11776.1_g00001.1 | polyphenol oxidase F, chloroplastic-like                         | 62932.33  | 0.093    | 2       | 0.586       | 0.016  |
| Sme2.5_15018.1_g00001.1 | Gag-pol protein, putative                                        | 66167.90  | 0.010    | 1       | 0.574       | 0.004  |
| Sme2.5_12240.1_g00001.1 | uncharacterized protein LOC101306013                             | 114772.30 | 0.028    | 2       | 0.381       | 0.002  |
| Sme2.5_05365.1_g00004.1 | cytochrome c1-1, heme protein, mitochondrial-like                | 35772.94  | 0.317    | 2       | 0.598       | 0.013  |
| Sme2.5_00118.1_g00007.1 | alpha-glucosidase                                                | 61176.01  | 0.117    | 5       | 0.576       | 0.001  |
| Sme2.5_09773.1_g00001.1 | pectin methyl esterase                                           | 63762.58  | 0.261    | 11      | 0.581       | 0.001  |
| Sme2.5_01136.1_g00003.1 | ADP/ATP translocator-like                                        | 50164.96  | 0.248    | 5       | 0.653       | 0.001  |
| Sme2.5_02193.1_g00001.1 | cysteine protease inhibitor 8-like                               | 34677.99  | 0.144    | 3       | 0.103       | 0.001  |
| Sme2.5_01374.1_g00009.1 | cytoplasmic ribosomal protein S13-like                           | 18548.42  | 0.472    | 7       | 0.659       | 0.001  |
| Sme2.5_03722.1_g00005.1 | phosphoenolpyruvate carboxylase                                  | 106816.00 | 0.288    | 4       | 0.616       | 0.015  |
| Sme2.5_25992.1_g00001.1 | chloroplast polyphenol oxidase precursor                         | 65196.35  | 0.403    | 16      | 0.518       | 0.001  |
| Sme2.5_00594.1_g00001.1 | 60S ribosomal protein L10                                        | 24698.94  | 0.250    | 3       | 0.495       | 0.013  |
| Sme2.5_00151.1_g00009.1 | unnamed protein product                                          | 12388.67  | 0.142    | 2       | 0.197       | 0.015  |
| Sme2.5_00396.1_g00018.1 | serine/arginine-rich splicing factor RS2Z32-like isoform 1       | 40515.85  | 0.093    | 3       | 0.661       | 0.006  |
| Sme2.5_00584.1_g00002.1 | 30S ribosomal protein S31, chloroplastic-like                    | 11783.15  | 0.232    | 3       | 0.615       | 0.001  |
| Sme2.5_00341.1_g00020.1 | glutathione reductase, cytosolic                                 | 109158.20 | 0.091    | 6       | 0.653       | 0.006  |
| Sme2.5_02308.1_g00006.1 | 40S ribosomal protein S26-2-like                                 | 15000.93  | 0.070    | 1       | 0.453       | 0.001  |
| Sme2.5_09935.1_g00001.1 | ribosome biogenesis regulatory protein homolog                   | 61521.38  | 0.040    | 2       | 0.621       | 0.015  |
| Sme2.5_00125.1_g00003.1 | calnexin-like protein precursor                                  | 61569.78  | 0.571    | 23      | 0.588       | 0.001  |
| Sme2.5_08981.1_g00001.1 | RNase Phy3, partial                                              | 56609.13  | 0.067    | 3       | 0.168       | 0.032  |
| Sme2.5_00183.1_g00014.1 | proliferation-associated protein 2G4-like                        | 43133.41  | 0.238    | 5       | 0.539       | 0.001  |
| Sme2.5_04572.1_g00005.1 | protein GPR107-like                                              | 49965.33  | 0.016    | 1       | 0.533       | 0.005  |
| Sme2.5_00940.1_g00015.1 | 40S ribosomal protein S16-like                                   | 22450.26  | 0.266    | 2       | 0.597       | 0.021  |
| Sme2.5_15806.1_g00001.1 | 40S ribosomal protein S16-like isoform 1                         | 16792.15  | 0.374    | 2       | 0.629       | 0.020  |
| Sme2.5_01826.1_g00003.1 | ferredoxin—NADP reductase, root-type isozyme, chloroplastic-like | 26544.13  | 0.462    | 3       | 0.607       | 0.011  |
| Sme2.5_00423.1_g00008.1 | ribosomal protein L11-like protein                               | 20931.98  | 0.326    | 6       | 0.664       | 0.001  |
| Sme2.5_00411.1_g00010.1 | translation machinery-associated protein 22-like isoform 1       | 22542.69  | 0.176    | 3       | 0.625       | 0.016  |
| Sme2.5_05142.1_g00002.1 | sucrose synthase-like                                            | 91913.37  | 0.308    | 15      | 0.598       | 0.001  |
| Sme2.5_04982.1_g00006.1 | protein ASPARTIC PROTEASE IN GUARD CELL 1-like                   | 52387.73  | 0.093    | 5       | 0.641       | 0.001  |
| Sme2.5_00048.1_g00028.1 | uncharacterized protein LOC101250105                             | 63267.26  | 0.227    | 12      | 0.633       | 0.001  |
| Sme2.5_00043.1_g00021.1 | hypothetical protein ZEAMMB73_313798                             | 11384.39  | 0.573    | 4       | 0.609       | 0.001  |
| Sme2.5_00088.1_g00019.1 | 40S ribosomal protein S3a-like                                   | 33114.47  | 0.463    | 5       | 0.348       | 0.047  |
| Sme2.5_04309.1_g00005.1 | HMG1/2-like protein-like isoform 2                               | 15804.77  | 0.486    | 2       | 0.131       | 0.009  |
| Sme2.5_10467.1_g00001.1 | histone H3                                                       | 15100.29  | 0.173    | 1       | 0.449       | 0.001  |
| Sme2.5_00188.1_g00020.1 | chalcone—flavonone isomerase-like                                | 23248.80  | 0.289    | 4       | 0.616       | 0.016  |
| Sme2.5_01635.1_g00012.1 | proline iminopeptidase-like                                      | 28944.77  | 0.081    | 3       | 0.589       | 0.011  |
| Sme2.5_02187.1_g00002.1 | pistil-specific extensin-like protein                            | 48531.74  | 0.088    | 2       | 0.257       | 0.001  |
| Sme2.5_00014.1_g00016.1 | histone H1                                                       | 28785.72  | 0.309    | 7       | 0.377       | 0.001  |
| Sme2.5_00075.1_g00019.1 | unnamed protein product                                          | 109506.70 | 0.018    | 1       | 0.385       | 0.006  |
| Sme2.5_01984.1_g00017.1 | uncharacterized protein LOC100793233                             | 12077.29  | 0.087    | 1       | 0.500       | 0.024  |
| Sme2.5_02192.1_g00004.1 | histone H2A-like protein                                         | 15549.89  | 0.264    | 2       | 0.631       | 0.039  |
| Sme2.5_01952.1_g00004.1 | 60S ribosomal protein L5-like                                    | 34877.01  | 0.118    | 3       | 0.492       | 0.009  |
| Sme2.5_02393.1_g00005.1 | zeatin O-xylosyltransferase-like                                 | 61266.97  | 0.011    | 1       | 0.532       | 0.041  |
| Sme2.5_02262.1_g00006.1 | uncharacterized protein LOC101250613                             | 31072.98  | 0.445    | 9       | 0.469       | 0.006  |
| Sme2.5_02324.1_g00008.1 | uncharacterized protein At4g01150, chloroplastic-like isoform 2  | 17951.45  | 0.124    | 2       | 0.648       | 0.011  |
| Sme2.5_07601.1_g00001.1 | methionine sulfoxide reductase A3                                | 35147.93  | 0.030    | 1       | 0.613       | 0.003  |
| Sme2.5_13307.1_g00002.1 | probable inactive purple acid phosphatase 27-like                | 49929.94  | 0.499    | 5       | 0.564       | 0.001  |

(Continued)

Table 4. (Continued)

| Protein_ID              | Description                                                                                                                          | Mass     | Coverage | Peptide | Fold change | Qvalue |
|-------------------------|--------------------------------------------------------------------------------------------------------------------------------------|----------|----------|---------|-------------|--------|
| Sme2.5_00499.1_g00004.1 | glutamate decarboxylase isoform2                                                                                                     | 60122.57 | 0.408    | 14      | 0.651       | 0.001  |
| Sme2.5_00776.1_g00002.1 | caffeoyl-CoA O-methyltransferase 6-like                                                                                              | 27700.24 | 0.147    | 2       | 0.607       | 0.038  |
| Sme2.5_03911.1_g00003.1 | L-ascorbate oxidase homolog                                                                                                          | 60764.81 | 0.118    | 5       | 0.664       | 0.007  |
| Sme2.5_00036.1_g00030.1 | 40S ribosomal protein S19-3-like                                                                                                     | 16111.41 | 0.517    | 1       | 0.650       | 0.006  |
| Sme2.5_00014.1_g00037.1 | Chain M, Localization Of The Large Subunit Ribosomal Proteins Into A 5.5 A Cryo-Em Map Of Triticum Aestivum Translating 80s Ribosome | 15158.07 | 0.514    | 6       | 0.591       | 0.001  |
| Sme2.5_01731.1_g00001.1 | phospholipase A1-II 1-like isoform 1                                                                                                 | 44138.36 | 0.756    | 11      | 0.603       | 0.001  |
| Sme2.5_00232.1_g00001.1 | Luminal-binding protein 5                                                                                                            | 73542.99 | 0.596    | 9       | 0.555       | 0.001  |

<https://doi.org/10.1371/journal.pone.0179018.t004>

This may indicate that the abundance of these proteins depends not only on transcript levels but also on posttranslational modification.

### GO annotation and KEGG pathway analysis of DEPs

We conducted GO enrichment and KEGG pathway analyses based on a hypergeometric test of all DEPs, with all proteins as the background. As shown in Fig 5, we itemized the respective top significant GO terms in Fig 5 during flower development and maturity. Fig 5A shows that significant biological processes during flower development concerned morphogenesis and metabolic processes. Significant biological processes varied greatly during flower maturity and included translation, gene expression, biosynthetic processes, and metabolic progress (Fig 5B). These findings are in agreement with current understanding of mature plant biochemical and physiological activities. For cellular components, terms related to the ribosome were enriched, suggesting that mature flowers had extensive and abundant translation, transcription, and regulation, more than in the developmental stage.

We also conducted a GO enrichment analysis for DEPs of L-morph and S-morph flowers between developing and mature stages. In the L-morph flowers, significant biological processes included primary metabolic processes and carbohydrate metabolic processes (S4A Fig). However, for the S-morph flowers, the significant enriched biological processes were primarily metabolic processes, translation, and gene expression (S4B Fig).

The top 20 significant KEGG pathways are illustrated in Figs 6 and S4. Phenylpropanoid biosynthesis and metabolic pathways were enriched during flower development (Fig 6A). The enriched pathways during flower maturity were ribosome formation, starch and sucrose metabolism, cyanoamino acid metabolism, pentose and glucuronate interconversions, phenylpropanoid biosynthesis, flavonoid biosynthesis, and proteasome formation (Fig 6B). Enriched DEP pathways in L-morph flowers during maturity relative to development included metabolic pathways, molecular biosynthesis, ribosome formation, carbon fixation, and ribonucleic acid (RNA) polymerase biosynthesis (S5A Fig). Enriched DEP pathways in S-morph flowers during maturity relative to development included carbon fixation, ribosome formation, metabolic pathways, proteasome biosynthesis, molecular biosynthesis, and aminoacyl-transfer RNA biosynthesis (S5B Fig).

### Protein-protein interaction analysis

Proteins in organisms do not act as single entities but rather form a variety of functional connections with each other, and these connections are fundamental in cellular processes. To



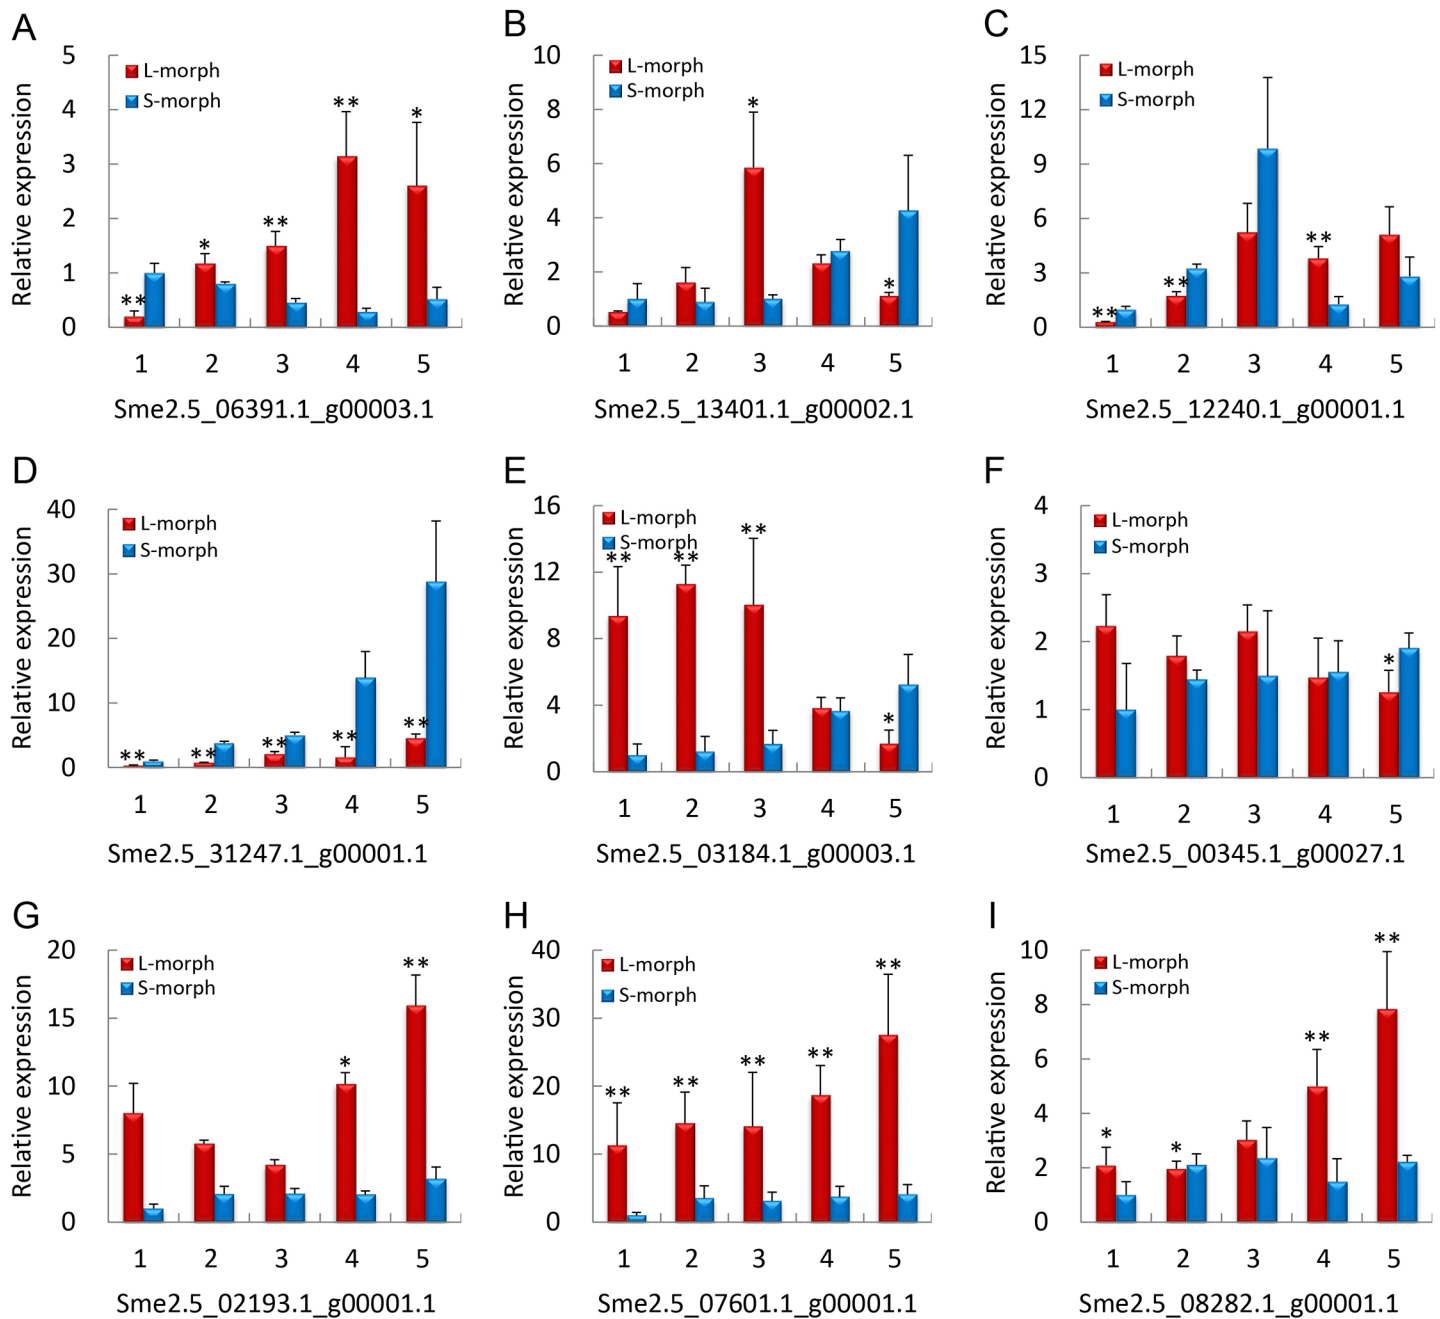

**Fig 4. qRT-PCR transcription level of genes related to heterostyly in different stages of S-morph and L-morph flowers.** Analysis of -expression of nine genes related to heterostyly in S-morph and L-morph flowers in eggplant by qRT-PCR at 0, 3, 6, 10, or 13 days after budding. Each bar represents the average of three samples  $\pm$  standard error. Asterisks indicate significant differences (\*,  $p < 0.05$ ; \*\*,  $p < 0.01$ ).

<https://doi.org/10.1371/journal.pone.0179018.g004>

uncover functional aspects associated with proteins in eggplant flowers, 225 proteins (Tables 1–4, with 16 overlapping DEPs between flower development and maturity) with significantly changed expression were analyzed by searching the STRING database. Fig 7 illustrates that six separate interaction networks were predicted. In each network, proteins that increased interacted with proteins that decreased to constitute a gene regulation network. These proteins were directly or indirectly related to pistil development differences of S-morph and L-morph

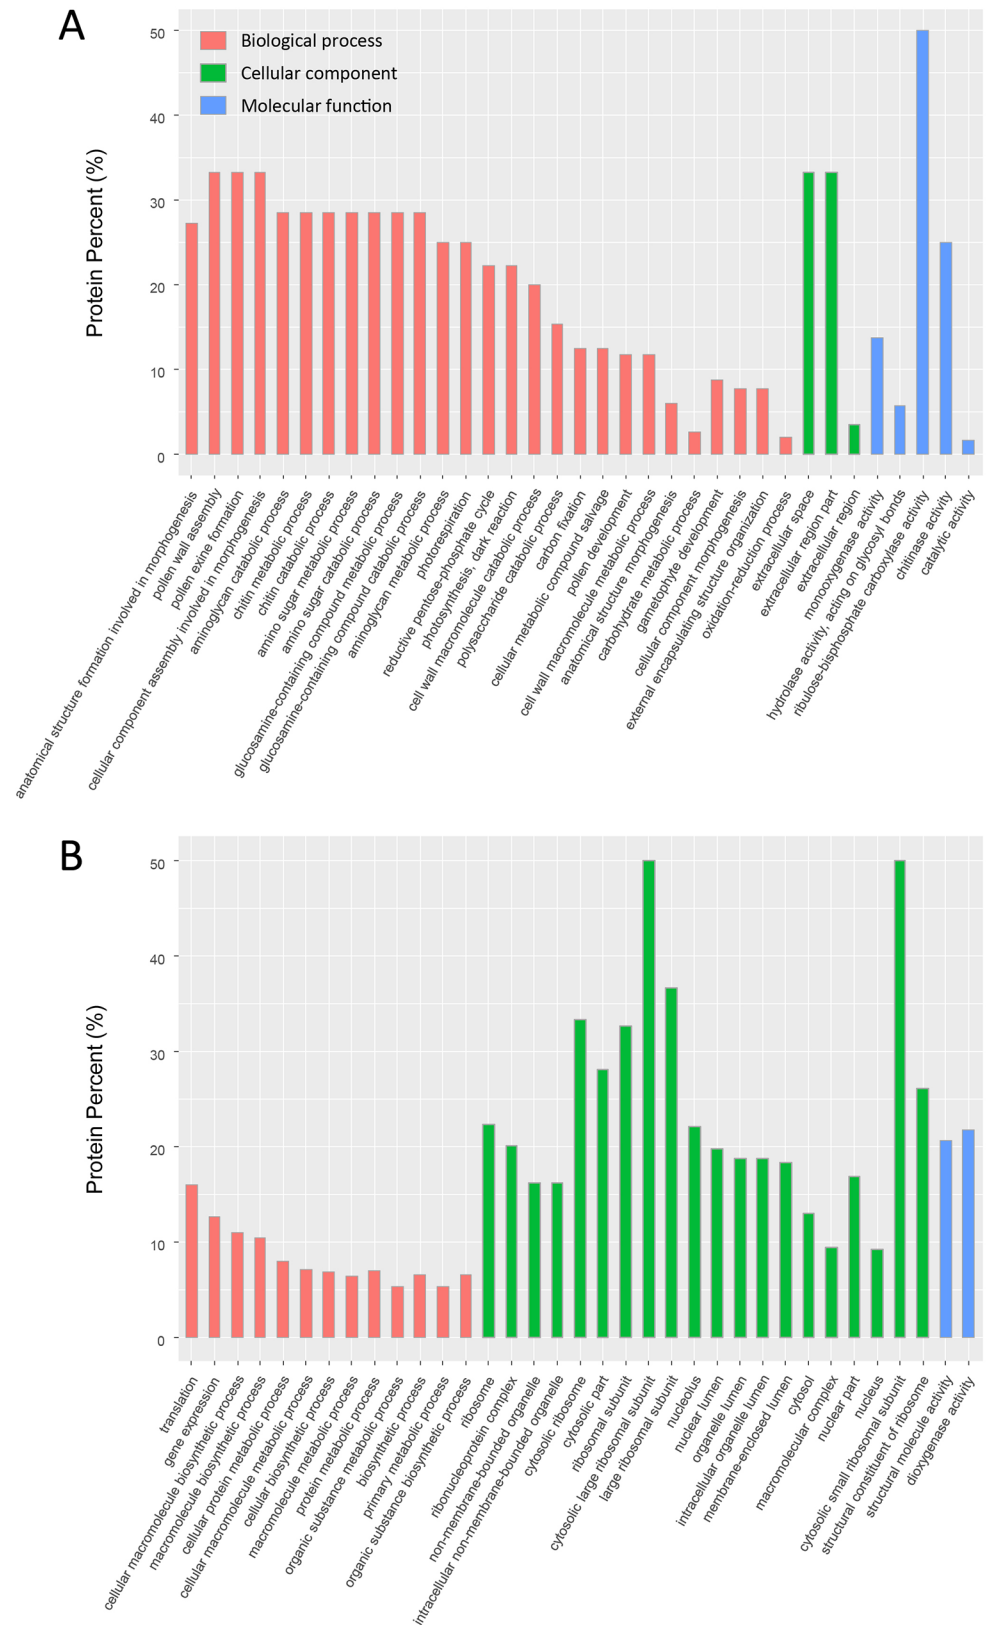

**Fig 5. GO annotation of DEPs between L-morph and S-morph flowers at different stages.** The distribution of the top 35 enriched GO terms of DEPs during flower development (A) and maturity (B) is shown.

<https://doi.org/10.1371/journal.pone.0179018.g005>

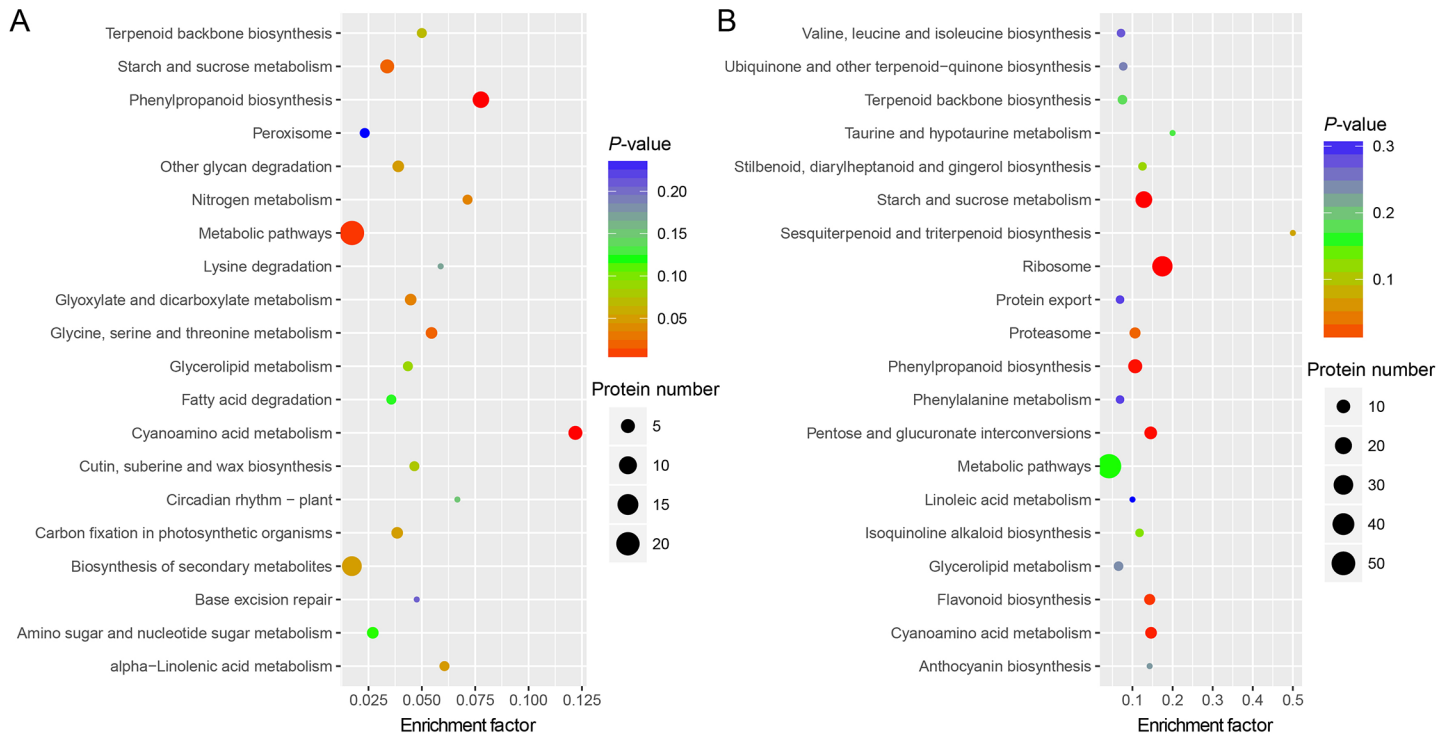

**Fig 6. KEGG pathway enrichment of the DEPs at different stages.** The distribution of the top 20 enriched KEGG pathways of DEPs during flower development (A) and maturity (B) is shown.

<https://doi.org/10.1371/journal.pone.0179018.g006>

flowers and were associated primarily with ribosome function, metabolic pathways, phenylpropanoid biosynthesis, starch and sucrose metabolism, and biosynthesis of secondary metabolites (Fig 7). Although these predicted interaction networks still need to be verified and further analyzed in future studies, the interactions between these proteins suggest that they have important roles in heterostyly development in eggplant.

## Discussion

Heterostyly, which produces a distinctive flower polymorphism and results in herkogamy, is widely distributed in angiosperms [1,27,28]. Heterostyly had important implications in plant adaptability and yield because it affects breeding systems. Phylogenetic analysis has shown that this phenotype has originated independently among the heterostyly species and arisen via distinct evolutionary developmental pathways [3]. However, eggplant heterostyly has not been well studied. The study of regulated gene expression levels in producing different flower morphs should give insights into mechanisms involved in heterostyly development. We found that buds of both L- and S-morph lengthened linearly during development. However, around 10 DAB, the L-morph pistils continued to increase but the S-morph pistils generally did not elongate. The self- and cross-pollination of L-morph and S-morph flowers indicated that the structure of the stigmatic surface in S-morph flowers may inhibit pollen germination.

A previous study [20] found that the pollination efficiency of L-morph flowers was the greatest, with a pollen germination percentage up to 100%. However, the percentage of pollen germination on the stigmas of S-morph flowers was much lower (< 5%). Another study found that the viability of pollen from L-morph and S-morph flowers exceeded 98% [36]. A third study indicated that there were differences in physiological and biochemical properties of



fertilization rates of S-morph flowers probably resulting from stigmatic incompatibility, rather than defects in the embryo sac. However, it is difficult to determine the mechanism underlying this difference in successful fruit set in S-morph and L-morph flowers.

iTRAQ is an advantageous technology used in comparative proteomic analysis that has provided greater reliability and accuracy for analysis in numerous studies [19,39]. In the present study, we used an iTRAQ approach to investigate the proteomic differences underlying heterostyly in eggplant. We identified 255 DEPs of S-morph and L-morph pistils during floral development and maturity. There were 33 upregulated and 24 downregulated genes during development, and 83 upregulated and 101 downregulated genes during maturity in S-morph compared with L-morph flowers (Tables 1–4). The results of qRT-PCR were highly consistent with our iTRAQ data. We characterized the differentially expressed proteins through GO, KEGG, and protein-protein interaction analyses. The protein expression differences were mainly involved in biosynthesis and metabolism, ribosomes, and expression regulation.

### Proteins involved in biosynthesis and metabolism

During development, molecular biosynthesis and metabolism, including amino acid and fatty acid biosynthesis, are generally upregulated to meet needs for growth. In this proteomic study, 86 proteins involved in biosynthesis and metabolism were differentially expressed between S-morph and L-morph flowers (S6 and S7 Tables), providing evidence that differences in storage and energy availability can play key roles in pistil development. DEPs were involved in the biosynthesis of amino acids including valine, leucine, and isoleucine. Other DEPs were involved in metabolic pathways including glycometabolism, glycerolipid metabolism, and phenylalanine metabolism. Pectin methyl esterase was downregulated in S-morph flowers during maturity; this enzyme is involved in structural modifications of the cell wall during growth and development and is involved in plant-pathogen interactions [40]. Most DEPs (15/19, S7 Table) involved in starch and sucrose metabolism were upregulated in S-morph flowers during maturity. We may infer here that differences in metabolic pathways may play important roles in the development of pistil length. In addition, many proteins were involved in other biosynthetic pathways, such as those for phenylpropanoids, flavonoids, isoquinoline alkaloids, terpenoids, anthocyanins, and other secondary metabolites.

### Proteins involved in ribosomes

The ribosome serves as the site of biological protein synthesis (translation), which links amino acids together in the order specified by messenger RNA molecules. Eukaryotes have 80S ribosomes, each consisting of a small (40S) and large (60S) subunit. In our study, the majority of both 60S and 40S ribosomal proteins was downregulated in S-morph flowers compared with L-morph flowers during maturity (Table 4). There were few differences in expression between the morphs during development (Tables 1 and 2), but the expression of ribosomal proteins was downregulated during maturity in S-morph flowers (Table 4). This may suggest that many proteins need to be translated during maturity as pollination and fruit development proceed.

### Proteins involved in expression regulation

Many binding proteins play important roles in complex and intricate regulatory networks. Here, we identified 14 differentially expressed proteins related to nucleotide binding (RNA-, deoxyribonucleic acid-, and protein-binding factors) between S-morph and L-morph flowers during maturity (Table 2) based on their putative molecular functions; these binding factors might regulate protein activity in complex biological processes. For instance, the expression level of glycine-rich RNA-binding protein (GRP) was upregulated in S-morph flowers during

maturity (1.56-fold, Table 3); this protein produces robust circadian oscillations and can suppress expression of the FLOWERING LOCUS C (FLC) protein, thereby promoting flowering [41,42]. FLC expression is directly promoted by histone H2A and leads to delayed flowering during vegetative growth [43]. In S-morph flowers at maturity, the histone H2A expression level was downregulated (1.58-fold, Table 4). Hence, we may infer that GRP and histone H2A tend to downregulate the expression of FLC to promote flowering in S-morph flowers. Additionally, the expression level of profilin-1 tended to be upregulated in S-morph flowers during development and maturity and was also upregulated in L-morph flowers during maturity. Pandey *et al.* [34] demonstrated that constitutive overexpression of cotton profilin-1 in tobacco induced early flowering [44]. Our results suggest that the expression changes of these binding proteins could affect blooming in S-morph flowers. Therefore, proteins involved in RNA-, deoxyribonucleic acid-, or protein-binding may be connected with heterostyly and regulate the pistil length of eggplant flowers.

Our study presents the first proteomic analysis of heterostyly development in eggplant. We identified approximately 225 DEPs in both developing and mature S-morph and L-morph flowers, whose expression levels might be closely related to heterostyly. Differences in flower development stages of the morphs were apparent in morphogenesis and metabolic processes. We discovered that some proteins associated with senescence and programmed cell death were upregulated in S-morph pistils, which may prevent them from developing into fruit. Our results provide valuable information on heterostyly in eggplant, and future studies of other heterostylous species may find similar mechanisms.

## Conclusions

We performed self- and cross-pollination of L-morph and S-morph flowers and compared embryo sac development in eggplant, which suggested that S-morph flowers have stigma incompatibility features that inhibit pollen germination and subsequent fertilization. To explore the molecular mechanisms underlying heterostylous development, we conducted an iTRAQ-based proteomic analysis of eggplant pistils for L-morph and S-morph flowers. There were 225 DEPs in both developing and mature stages of S-morph and L-morph flowers whose expression levels might be closely related to heterostyly. We also conducted qRT-PCR for nine genes to verify DEPs from the iTRAQ data. Differences during flower development between the morphs were primarily observed in proteins related to morphogenesis and metabolic processes. Important biological processes, including translation, gene expression, biosynthetic processes, and metabolic progress, varied greatly during flower maturity. Additionally, we discovered that some proteins associated with programmed cell death were upregulated in S-morph pistils; these may be associated with low fruit set in these flowers. Our research provides important information for understanding eggplant heterostyly and establishes a foundation for the study of relevant mechanisms. It also highlights the importance of complex characters for understanding relationships between proteomic and phenotypic variation.

## Supporting information

**S1 Fig. General workflow and summary of the present study.** The figure shows the workflow from sample collection to iTRAQ as well as the downstream analyses. (TIF)

**S2 Fig. Identified proteins.** (A) Protein identification coverage distribution. Total spectra = the total number of identified secondary spectra. Spectra = the number of spectra matched. Unique spectra = the number of unique peptide spectra. Peptide = the total number of

identified peptides. Unique peptide = the number of identified unique peptides. Protein = the total number of identified proteins. (B) Peptide length distribution. The x-axis shows the peptide length and the y-axis shows the corresponding peptide percentage. (C) Unique peptide number distribution. The x-axis shows the unique peptide number of each protein and the y-axis shows the corresponding protein number.

(TIF)

**S3 Fig. Function annotation of identified proteins.** (A) COG classification of identified proteins. The horizontal axis is the COG function class and the vertical axis is the number of proteins in each class. (B) GO annotation of all identified proteins. C. KEGG pathway analysis of all identified proteins.

(TIF)

**S4 Fig. GO annotation of DEPs of L-morph and S-morph flowers between different stages.** The distribution of the top 35 enriched GO terms of DEPs for L-morph (A) and S-morph flowers (B) between flower development and maturity is shown.

(TIF)

**S5 Fig. KEGG pathway enrichment of the DEPs during different stages.** The distribution of the top 20 enriched KEGG pathways of DEPs for L-morph (A) and S-morph flowers (B) between flower development and maturity is shown.

(TIF)

**S1 Table. The primers used for qRT-PCR in the experiment.**

(DOCX)

**S2 Table. Upregulated proteins in pistils of L-morph flowers during maturity with a 1.5-fold change compared with developmental stage.**

(DOCX)

**S3 Table. Downregulated proteins in pistils of L-morph flowers during maturity with a 1.5-fold change compared with developmental stage.**

(DOCX)

**S4 Table. Upregulated proteins in pistils of S-morph flowers during maturity with a 1.5-fold change compared with developmental stage.**

(DOCX)

**S5 Table. Downregulated proteins in pistils of S-morph flowers during maturity with a 1.5-fold change compared with developmental stage.**

(DOCX)

**S6 Table. DEPs between S-morph and L-morph flowers enriched in each pathway during development.**

(DOCX)

**S7 Table. DEPs between S-morph and L-morph flowers enriched in each pathway during maturity.**

(DOCX)

## Acknowledgments

This study was financially supported by National Natural Science Foundation of China (31660573), China Agriculture Research System (CARS-25-C-04), and the Guangxi

Innovation Team Project of Vegetable of China Agriculture Research System (nycytxgxcxtd-03-10). The funders had no role in study design, data collection and analysis, decision to publish, or preparation of the manuscript.

## Author Contributions

**Conceptualization:** YW AL RC.

**Data curation:** YW WL YJ YL.

**Formal analysis:** AL WL SS.

**Funding acquisition:** YW RC.

**Investigation:** YW AL WL.

**Methodology:** YK AL RC.

**Project administration:** YW RC.

**Resources:** YW RC.

**Supervision:** RC.

**Validation:** SS YL.

**Visualization:** YW AL.

**Writing – original draft:** YW AL RC.

**Writing – review & editing:** YW AL WL YJ SS YL RC.

## References

1. de Vos JM, Hughes CE, Schneeweiss GM, Moore BR, Conti E (2014) Heterostyly accelerates diversification via reduced extinction in primroses. *Proc Biol Sci* 281: 20140075. <https://doi.org/10.1098/rspb.2014.0075> PMID: 24759859
2. Barrett SC (1990) The evolution and adaptive significance of heterostyly. *Trends Ecol Evol* 5: 144–148. [https://doi.org/10.1016/0169-5347\(90\)90220-8](https://doi.org/10.1016/0169-5347(90)90220-8) PMID: 21232342
3. Cohen JI, Litt A, Davis JI (2012) Comparative floral development in Lithospermum (Boraginaceae) and implications for the evolution and development of heterostyly. *Am J Bot* 99: 797–805. <https://doi.org/10.3732/ajb.1100329> PMID: 22494907
4. Ganders FR (1979) The biology of heterostyly. *New Zealand Journal of Botany* 17: 607–635.
5. Keller B, Thomson JD, Conti E (2014) Heterostyly promotes disassortative pollination and reduces sexual interference in Darwin's primroses: evidence from experimental studies. *Functional Ecology* 28: 1413–1425.
6. Ushijima K, Nakano R, Bando M, Shigezane Y, Ikeda K, et al. (2012) Isolation of the floral morph-related genes in heterostylous flax (*Linum grandiflorum*): the genetic polymorphism and the transcriptional and post-transcriptional regulations of the S locus. *Plant J* 69: 317–331. <https://doi.org/10.1111/j.1365-3113X.2011.04792.x> PMID: 21923744
7. Barrett SCH (1992) *Evolution and function of heterostyly*. Berlin; New York: Springer-Verlag. xi, 279 p.
8. Nowak MD, Russo G, Schlapbach R, Huu CN, Lenhard M, et al. (2015) The draft genome of *Primula veris* yields insights into the molecular basis of heterostyly. *Genome Biol* 16: 12. <https://doi.org/10.1186/s13059-014-0567-z> PMID: 25651398
9. Gygi SP, Rochon Y, Franza BR, Aebersold R (1999) Correlation between protein and mRNA abundance in yeast. *Mol Cell Biol* 19: 1720–1730. PMID: 10022859
10. Washburn MP, Koller A, Oshiro G, Ulaszek RR, Plouffe D, et al. (2003) Protein pathway and complex clustering of correlated mRNA and protein expression analyses in *Saccharomyces cerevisiae*. *Proc Natl Acad Sci U S A* 100: 3107–3112. <https://doi.org/10.1073/pnas.0634629100> PMID: 12626741



11. Belle A, Tanay A, Bitincka L, Shamir R, O'Shea EK (2006) Quantification of protein half-lives in the budding yeast proteome. *Proc Natl Acad Sci U S A* 103: 13004–13009. <https://doi.org/10.1073/pnas.0605420103> PMID: 16916930
12. Ma C, Zhou J, Chen G, Bian Y, Lv D, et al. (2014) iTRAQ-based quantitative proteome and phosphoprotein characterization reveals the central metabolism changes involved in wheat grain development. *BMC Genomics* 15: 1029. <https://doi.org/10.1186/1471-2164-15-1029> PMID: 25427527
13. Wang J, Yu L, Huang X, Wang Y, Zhao J (2016) Comparative proteome analysis of saccular intracranial aneurysms with iTRAQ quantitative proteomics. *J Proteomics* 130: 120–128. <https://doi.org/10.1016/j.jprot.2015.09.014> PMID: 26385002
14. Yang M, Dong J, Zhao W, Gao X (2016) Characterization of proteins involved in early stage of wheat grain development by iTRAQ. *J Proteomics* 136: 157–166. <https://doi.org/10.1016/j.jprot.2016.01.002> PMID: 26779988
15. Fu Y, Zhang H, Mandal SN, Wang C, Chen C, et al. (2016) Quantitative proteomics reveals the central changes of wheat in response to powdery mildew. *J Proteomics* 130: 108–119. <https://doi.org/10.1016/j.jprot.2015.09.006> PMID: 26381202
16. Zi J, Zhang J, Wang Q, Zhou B, Zhong J, et al. (2013) Stress responsive proteins are actively regulated during rice (*Oryza sativa*) embryogenesis as indicated by quantitative proteomics analysis. *PLoS One* 8: e74229. <https://doi.org/10.1371/journal.pone.0074229> PMID: 24058531
17. Elliott MH, Smith DS, Parker CE, Borchers C (2009) Current trends in quantitative proteomics. *J Mass Spectrom* 44: 1637–1660. <https://doi.org/10.1002/jms.1692> PMID: 19957301
18. Aggarwal K, Choe LH, Lee KH (2006) Shotgun proteomics using the iTRAQ isobaric tags. *Brief Funct Genomic Proteomic* 5: 112–120. <https://doi.org/10.1093/bfgp/ell018> PMID: 16772272
19. Ross PL, Huang YN, Marchese JN, Williamson B, Parker K, et al. (2004) Multiplexed protein quantitation in *Saccharomyces cerevisiae* using amine-reactive isobaric tagging reagents. *Mol Cell Proteomics* 3: 1154–1169. <https://doi.org/10.1074/mcp.M400129-MCP200> PMID: 15385600
20. Meng Q, Hou L, Zhao Y, Huang X, Huang Y, et al. (2014) iTRAQ-based proteomic study of the effects of *Spiroplasma eriocheiris* on Chinese mitten crab *Eriocheir sinensis* hemocytes. *Fish Shellfish Immunol* 40: 182–189. <https://doi.org/10.1016/j.fsi.2014.06.029> PMID: 25017370
21. Barchi L, Lanteri S, Portis E, Acquadro A, Vale G, et al. (2011) Identification of SNP and SSR markers in eggplant using RAD tag sequencing. *BMC Genomics* 12: 304. <https://doi.org/10.1186/1471-2164-12-304> PMID: 21663628
22. Bradford MM (1976) A rapid and sensitive method for the quantitation of microgram quantities of protein utilizing the principle of protein-dye binding. *Anal Biochem* 72: 248–254. PMID: 942051
23. Kanehisa M, Goto S (2000) KEGG: kyoto encyclopedia of genes and genomes. *Nucleic Acids Res* 28: 27–30. PMID: 10592173
24. Yu S, Cai X, Sun L, Zuo Z, Mipam T, et al. (2016) Comparative iTRAQ proteomics revealed proteins associated with spermatogenic arrest of cattleyak. *J Proteomics* 142: 102–113. <https://doi.org/10.1016/j.jprot.2016.04.049> PMID: 27153760
25. Jensen LJ, Kuhn M, Stark M, Chaffron S, Creevey C, et al. (2009) STRING 8—a global view on proteins and their functional interactions in 630 organisms. *Nucleic Acids Res* 37: D412–416. <https://doi.org/10.1093/nar/gkn760> PMID: 18940858
26. Schmittgen TD, Livak KJ (2008) Analyzing real-time PCR data by the comparative C(T) method. *Nat Protoc* 3: 1101–1108. PMID: 18546601
27. Weller SG (2009) The different forms of flowers—what have we learned since Darwin? *Botanical Journal of the Linnean Society* 160: 249–261.
28. Cohen JI (2010) "A case to which no parallel exists": The influence of Darwin's Different Forms of Flowers. *Am J Bot* 97: 701–716. <https://doi.org/10.3732/ajb.0900395> PMID: 21622437
29. Hirakawa H, Shirasawa K, Miyatake K, Nunome T, Negoro S, et al. (2014) Draft genome sequence of eggplant (*Solanum melongena* L.): the representative solanum species indigenous to the old world. *DNA Res* 21: 649–660. <https://doi.org/10.1093/dnares/dsu027> PMID: 25233906
30. Liepman AH, Olsen LJ (2001) Peroxisomal alanine: glyoxylate aminotransferase (AGT1) is a photorepiratory enzyme with multiple substrates in *Arabidopsis thaliana*. *Plant J* 25: 487–498. PMID: 11309139
31. Grudkowska M, Zagdanska B (2004) Multifunctional role of plant cysteine proteinases. *Acta Biochim Pol* 51: 609–624. <https://doi.org/10.45103609> PMID: 15448724
32. Sadanandom A, Poghosyan Z, Fairbairn DJ, Murphy DJ (2000) Differential regulation of plastidial and cytosolic isoforms of peptide methionine sulfoxide reductase in *Arabidopsis*. *Plant Physiol* 123: 255–264. PMID: 10806242

33. Mohan R, Kolattukudy PE (1990) Differential Activation of Expression of a Suberization-Associated Anionic Peroxidase Gene in Near-Isogenic Resistant and Susceptible Tomato Lines by Elicitors of *Verticillium albo-atratrum*. *Plant Physiol* 92: 276–280. PMID: [16667260](#)
34. Molina A, Mena M, Carbonero P, Garcia-Olmedo F (1997) Differential expression of pathogen-responsive genes encoding two types of glycine-rich proteins in barley. *Plant Mol Biol* 33: 803–810. PMID: [9106504](#)
35. Lauvergeat V, Lacomme C, Lacombe E, Lasserre E, Roby D, et al. (2001) Two cinnamoyl-CoA reductase (CCR) genes from *Arabidopsis thaliana* are differentially expressed during development and in response to infection with pathogenic bacteria. *Phytochemistry* 57: 1187–1195. PMID: [11430991](#)
36. Vijayalalitha SJ, Ganesh S (2012) Studies on Reproductive Biology of Brinjal (*Solanum melongena* L.). *Advances in Plant Sciences* 25: 357–363.
37. Handique AK, Sarma A (1995) Alteration of heterostyly in *Solanum melongena* L. through gamma-radiation and hormonal treatment. *Journal of Nuclear Agriculture and Biology* 24: 121–126.
38. Rylski I, Nothmann J, Arcan L (1984) Differential fertility in short-styled eggplant flowers. *Scientia Horticulturae* 22: 39–46.
39. Liu PF, Du Y, Meng L, Li X, Liu Y (2017) Proteomic analysis in kidneys of Atlantic salmon infected with *Aeromonas salmonicida* by iTRAQ. *Dev Comp Immunol* 72: 140–153. <https://doi.org/10.1016/j.dci.2017.02.013> PMID: [28235584](#)
40. Zega A D, Ovidio R (2016) Genome-wide characterization of pectin methyl esterase genes reveals members differentially expressed in tolerant and susceptible wheats in response to *Fusarium graminearum*. *Plant Physiol Biochem* 108: 1–11. <https://doi.org/10.1016/j.plaphy.2016.06.033> PMID: [27393991](#)
41. Kim JS, Park SJ, Kwak KJ, Kim YO, Kim JY, et al. (2007) Cold shock domain proteins and glycine-rich RNA-binding proteins from *Arabidopsis thaliana* can promote the cold adaptation process in *Escherichia coli*. *Nucleic Acids Res* 35: 506–516. <https://doi.org/10.1093/nar/gkl1076> PMID: [17169986](#)
42. Streitner C, Danisman S, Wehrle F, Schoning JC, Alfano JR, et al. (2008) The small glycine-rich RNA binding protein AtGRP7 promotes floral transition in *Arabidopsis thaliana*. *Plant J* 56: 239–250. <https://doi.org/10.1111/j.1365-3113X.2008.03591.x> PMID: [18573194](#)
43. He Y, Michaels SD, Amasino RM (2003) Regulation of flowering time by histone acetylation in *Arabidopsis*. *Science* 302: 1751–1754. <https://doi.org/10.1126/science.1091109> PMID: [14593187](#)
44. Pandey DK, Chaudhary B (2016) Domestication-driven *Gossypium* profilin 1 (GhPRF1) gene transduces early flowering phenotype in tobacco by spatial alteration of apical/floral-meristem related gene expression. *BMC Plant Biol* 16: 112. <https://doi.org/10.1186/s12870-016-0798-0> PMID: [27177585](#)
